# Supplementary material for: A practical and efficient approach to imidazo[1,2-a]pyridine-fused isoquinolines through the post-GBB transformation strategy
Source: PubMed Central journal article supplement (PMC5433183; doi:10.3762/bjoc.13.82), 2017-05-04

**Supporting Information**  
**for**  
**A practical and efficient approach to**  
**imidazo[1,2-*a*]pyridine-fused isoquinolines through the**  
**post-GBB transformation strategy**

Taofeng Shao, Zhiming Gong, Tianyi Su, Wei Hao, and Chao Che\*

Address: Laboratory of Chemical Genomics, Engineering Laboratory for Chiral Drug Synthesis,  
School of Chemical Biology and Biotechnology, Peking University Shenzhen Graduate School,  
Shenzhen 518055, China

Email: Chao Che - [chec@pkusz.edu.cn](mailto:chec@pkusz.edu.cn)

\*Corresponding author

**Characterization data for all compounds and copies of NMR spectra**  
**for compounds 6a–s**

## General Information

Unless noted otherwise, all reactions are performed under a nitrogen atmosphere and materials obtained from commercial suppliers were used without further purification.  $^1\text{H}$  NMR spectra were recorded on a 300 MHz, 400 MHz spectrometer using residual solvent ( $\delta$  ( $\text{CDCl}_3$ ) = 7.26) as internal standard. All coupling constants are reported in hertz (Hz).  $^{13}\text{C}$  NMR spectra were recorded on the same instruments and chemical shifts were measured relative to solvent resonances ( $\delta$  ( $\text{CDCl}_3$ ) = 77.0 ppm). High resolution mass spectra were obtained on a quadrupole time-of-flight (QqTOF) mass spectrometer utilizing electrospray ionization (ESI) method.

## Characterization data

*N*-(*tert*-Butyl)-2-(2-ethynylphenyl)imidazo[1,2-*a*]pyridin-3-amine (**4a**)

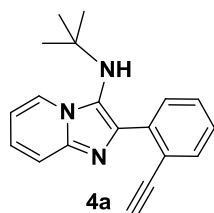

Yield: 90%;  $^1\text{H}$  NMR (400 MHz,  $\text{CDCl}_3$ )  $\delta$  8.31 (*d*,  $J$  = 6.8 Hz, 1H), 7.82 (*d*,  $J$  = 8.0 Hz, 1H), 7.45-7.59 (*m*, 3 H), 7.30-7.34 (*m*, 1H), 7.13 (*t*,  $J$  = 7.6 Hz, 1H), 6.76 (*t*,  $J$  = 6.8 Hz, 1H), 3.65 (*s*, 1H), 3.18 (*s*, 1H), 0.90 (*s*, 9H);  $^{13}\text{C}$  NMR (100 MHz,

$\text{CDCl}_3$ )  $\delta$  142.4, 138.6, 138.4, 133.3, 131.1, 129.4, 127.4, 125.3, 124.1, 123.8, 120.1, 117.3, 111.2, 84.4, 79.6, 55.9, 29.8.

*N*-(*tert*-Butyl)-2-(2-ethynylphenyl)-6-methylimidazo[1,2-*a*]pyridin-3-amine (**4b**)

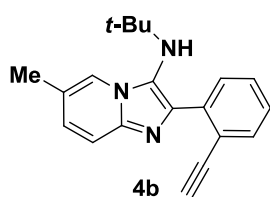

Yield: 94%;  $^1\text{H}$  NMR (400 MHz,  $\text{CDCl}_3$ )  $\delta$  8.09 (*s*, 1H), 7.80 (*d*,  $J$  = 7.2 Hz, 1H), 7.57 (*dd*,  $J$  = 0.8, 7.6 Hz, 1H), 7.42-7.48 (*m*, 2H), 7.29-7.33 (*m*, 1H), 6.99 (*dd*,  $J$  = 1.6, 9.2 Hz, 1H), 3.62 (*s*, 1H), 3.17 (*s*, 1H), 2.33 (*s*, 3H), 0.90 (*s*,

9H);  $^{13}\text{C}$  NMR (100 MHz,  $\text{CDCl}_3$ )  $\delta$  141.4, 138.7, 138.3, 133.2, 131.0, 129.4, 127.4, 127.3, 125.0, 121.3, 120.7, 120.0, 116.6, 84.4, 79.5, 55.9, 29.8, 18.4.

*N*-(*tert*-Butyl)-6-chloro-2-(2-ethynylphenyl)imidazo[1,2-*a*]pyridin-3-amine (**4c**)

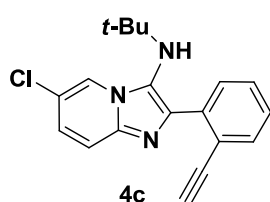

Yield: 80%;  $^1\text{H}$  NMR (300 MHz,  $\text{CDCl}_3$ ):  $\delta$  8.35 (*d*,  $J = 1.5$ , 1H), 7.81 (*dd*,  $J = 0.9, 7.8$  Hz, 1H), 7.60 (*d*,  $J = 7.8$  Hz, 1H), 7.48-7.51 (*m*, 2H), 7.32-7.37 (*m*, 1H), 7.11 (*dd*,  $J = 2.1, 9.6$  Hz, 1H), 3.66 (*s*, 1H), 3.19 (*s*, 1H), 0.91 (*s*, 9H);

$^{13}\text{C}$  NMR (75 MHz,  $\text{CDCl}_3$ )  $\delta$  140.4, 139.5, 138.0, 133.3, 130.9, 129.4, 127.6, 125.7, 125.5, 121.6, 120.0, 119.8, 117.8, 84.2, 79.8, 55.9, 29.7.

*N*-(*tert*-Butyl)-6-(2-ethynylphenyl)imidazo[2,1-*b*]thiazol-5-amine (**4d**)

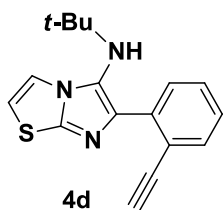

Yield: 62%;  $^1\text{H}$  NMR (300 MHz,  $\text{CDCl}_3$ )  $\delta$  7.73 (*d*,  $J = 7.8$  Hz, 1H), 7.56 (*d*,  $J = 7.8$  Hz, 1H), 7.41-7.46 (*m*, 2H), 7.25-7.30 (*m*, 1H), 6.73 (*m*, 1H), 3.72 (*s*, 1H), 3.24 (*s*, 1H), 0.90 (*s*, 9H);  $^{13}\text{C}$  NMR (75 MHz,  $\text{CDCl}_3$ )  $\delta$  145.4, 138.7, 138.3,

133.2, 130.7, 129.3, 127.3, 127.0, 119.3, 117.9, 111.4, 84.4, 79.7, 55.3, 29.6.

*N*-(*tert*-Butyl)-2-(2-ethynylphenyl)imidazo[1,2-*a*]pyrazin-3-amine (**4e**)

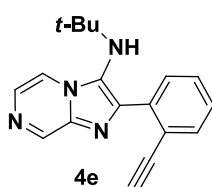

Yield: 96%;  $^1\text{H}$  NMR (400 MHz,  $\text{CDCl}_3$ )  $\delta$  9.00 (*d*,  $J = 1.2$  Hz, 1H), 8.21-8.22 (*m*, 1H), 7.85-7.86 (*m*, 1H), 7.70 (*d*,  $J = 8.0$  Hz, 1H), 7.61 (*d*,  $J = 8.0$  Hz, 1H), 7.48-7.752 (*m*, 1H), 7.36-7.40 (*m*, 1H), 3.72 (*s*, 1H), 3.20 (*s*, 1H), 0.91 (*s*, 9H);

$^{13}\text{C}$  NMR (100 MHz,  $\text{CDCl}_3$ )  $\delta$  143.5, 141.2, 137.6, 137.5, 133.4, 131.1, 130.9, 129.6, 128.9, 128.8, 128.1, 126.8, 120.3, 116.6, 83.9, 80.2, 56.4, 29.7.

*N*-(*tert*-Butyl)-2-(2-ethynyl-5-methoxyphenyl)imidazo[1,2-*a*]pyridin-3-amine (**4f**)

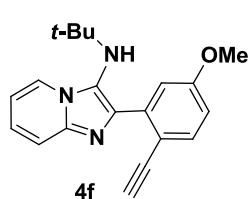

Yield: 89%;  $^1\text{H}$  NMR (400 MHz,  $\text{CDCl}_3$ )  $\delta$  8.32 (*dd*,  $J = 1.2, 6.8$  Hz, 1H), 7.48-7.54 (*m*, 2H), 7.33 (*d*,  $J = 2.4$  Hz, 1H), 7.12-7.15 (*m*, 1H), 6.87-6.89 (*m*, 1H), 6.76 (*t*,  $J = 6.8$  Hz, 1H), 3.87(*s*, 3H), 3.73 (*s*, 1H), 3.11 (*s*, 1H), 0.91 (*s*, 9H);  $^{13}\text{C}$  NMR (100 MHz,  $\text{CDCl}_3$ )  $\delta$  160.2, 142.2, 140.4, 138.4, 134.7, 125.3, 124.2, 123.8, 117.3, 115.0, 114.7, 112.5, 111.2, 84.6, 78.3, 55.9, 55.5, 29.8.

*N*-(*tert*-Butyl)-2-(2-ethynyl-5-methoxyphenyl)-8-methylimidazo[1,2-*a*]pyridin-3-amine (**4g**)

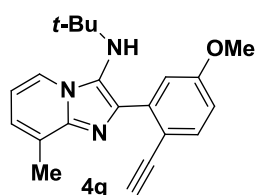

Yield: 61%;  $^1\text{H}$  NMR (300 MHz,  $\text{CDCl}_3$ )  $\delta$  8.20 (*d*,  $J = 6.6$  Hz, 1H), 7.49 (*d*,  $J = 8.4$  Hz, 1H), 7.37 (*d*,  $J = 2.7$  Hz, 1H), 6.95 (*d*,  $J = 2.7$  Hz, 1H), 6.85(*dd*,  $J = 2.7, 8.9$  Hz, 1H), 6.69 (*t*,  $J = 6.9$  Hz, 1H), 3.89 (*s*, 3H), 3.72 (*s*, 1H), 3.11 (*s*, 1H), 2.63 (*s*, 3H), 0.92 (*s*, 9H);  $^{13}\text{C}$  NMR (75 MHz,  $\text{CDCl}_3$ )  $\delta$  160.1, 142.4, 140.5, 137.8, 134.6, 126.9, 125.6, 123.0, 121.7, 115.1, 114.6, 112.5, 111.2, 84.5, 78.2, 55.8, 55.4, 29.8, 16.6.

*N*-(*tert*-Butyl)-6-(2-ethynyl-5-methoxyphenyl)imidazo[2,1-*b*]thiazol-5-amine (**4h**)

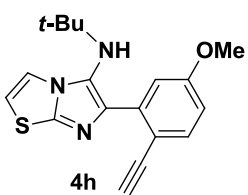

Yield: 85%;  $^1\text{H}$  NMR (400 MHz,  $\text{CDCl}_3$ )  $\delta$  7.44 (*d*,  $J = 8.8$  Hz, 1H), 7.42 (*d*,  $J = 4.4$  Hz, 1H), 7.25 (*d*,  $J = 2.4$  Hz, 1H), 6.84 (*dd*,  $J = 2.4, 8.4$  Hz, 1H), 6.73 (*d*,  $J = 4.4$  Hz, 1H), 3.86 (*s*, 3H), 3.80 (*s*, 1H), 3.17 (*s*, 1H), 0.92 (*s*, 9H);  $^{13}\text{C}$  NMR (100 MHz,  $\text{CDCl}_3$ )  $\delta$  160.2, 145.4, 140.1, 138.8, 134.8, 127.4, 118.0, 114.7, 114.3, 111.7, 111.4, 84.7, 78.5, 55.5, 55.4, 29.7.

*N*-(*tert*-Butyl)-2-(2-ethynyl-5-methoxyphenyl)imidazo[1,2-*a*]pyrazin-3-amine (**4i**)

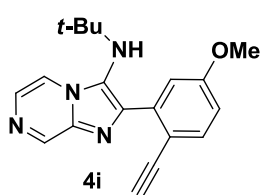

Yield: 88%; <sup>1</sup>H NMR (300 MHz, CDCl<sub>3</sub>) δ 9.01 (s, 1H), 8.22 (d, *J* = 4.5 Hz, 1H), 7.86 (d, *J* = 4.8 Hz, 1H), 7.52 (d, *J* = 8.4 Hz, 1H), 7.30 (d, *J* = 2.4 Hz, 1H), 6.93 (dd, *J* = 2.4, 8.7 Hz, 1H), 3.88 (s, 3H), 3.82 (s, 1H), 3.13 (s, 1H),

0.92 (s, 9H); <sup>13</sup>C NMR (75 MHz, CDCl<sub>3</sub>) δ 160.3, 143.4, 141.1, 139.0, 137.4, 134.9, 128.6, 126.8, 116.7, 115.5, 114.9, 112.5, 84.0, 78.8, 56.4, 55.5, 29.7.

6-Bromo-*N*-(*tert*-butyl)-2-(2-ethynyl-4-methylphenyl)imidazo[1,2-*a*]pyridin-3-amine (**4j**)

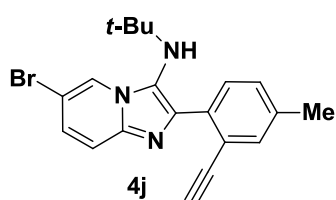

Yield: 64%; <sup>1</sup>H NMR (300 MHz, CDCl<sub>3</sub>) δ 8.44 (s, 1H), 7.68 (d, *J* = 7.8 Hz, 1H), 7.43 (d, *J* = 9.3 Hz, 2H), 7.30 (m, 1H), 7.19 (dd, *J* = 1.8, 9.3 Hz, 1H), 3.68 (s, 1H), 3.16 (s, 1H), 2.38 (s, 3H), 0.91 (s, 9H); <sup>13</sup>C NMR

(75 MHz, CDCl<sub>3</sub>) δ 140.4, 139.3, 137.5, 135.2, 133.7, 130.8, 130.5, 127.3, 125.4, 123.8, 119.8, 118.0, 106.2, 84.4, 79.4, 55.9, 29.7, 21.0.

*N*-(*tert*-Butyl)-2-(2-ethynyl-4-methylphenyl)-6-methylimidazo[1,2-*a*]pyridin-3-amine (**4k**)

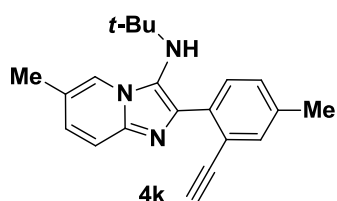

Yield: 75%; <sup>1</sup>H NMR (400 MHz, CDCl<sub>3</sub>) δ 8.08 (s, 1H), 7.70 (d, *J* = 8.0 Hz, 1H), 7.39-7.44 (m, 2H), 7.28 (d, *J* = 8.8 Hz, 1H), 6.98 (dd, *J* = 1.6, 9.2 Hz, 1H), 3.65 (s, 1H), 3.14 (s, 1H), 2.37 (s, 3H), 2.33 (s, 3H),

0.91 (s, 9H); <sup>13</sup>C NMR (100 MHz, CDCl<sub>3</sub>) δ 141.3, 138.3, 137.1, 136.0, 133.6, 130.9, 130.4, 127.2, 124.8, 121.3, 120.6, 119.7, 116.6, 84.7, 79.1, 55.8, 29.8, 21.0, 18.4.

*N*-(*tert*-Butyl)-2-(2-ethynyl-4-methylphenyl)-8-methylimidazo[1,2-*a*]pyridin-3-amine (**4l**)

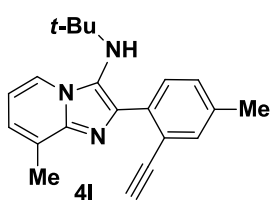

Yield: 49%;  $^1\text{H}$  NMR (300 MHz,  $\text{CDCl}_3$ )  $\delta$  8.19 (*d*,  $J = 6.9$  Hz, 1H), 7.74 (*d*,  $J = 8.1$  Hz, 1H), 7.41 (*s*, 1H), 7.27-7.31 (*m*, 1H), 6.94 (*d*,  $J = 6.6$  Hz, 1H), 6.69 (*t*,  $J = 6.6$  Hz, 1H), 3.66 (*s*, 1H), 3.15 (*s*, 1H), 2.63 (*s*, 3H), 2.38 (*s*, 3H),

0.91 (*s*, 9H);  $^{13}\text{C}$  NMR (75 MHz,  $\text{CDCl}_3$ )  $\delta$  142.4, 137.8, 137.1, 135.9, 133.5, 131.1, 130.5, 126.8, 125.4, 122.8, 121.6, 129.8, 111.1, 84.6, 79.1, 55.7, 29.8, 20.9, 16.7.

*N*-(*tert*-Butyl)-2-(5-chloro-2-ethynylphenyl)imidazo[1,2-*a*]pyridin-3-amine (**4m**)

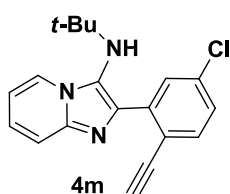

Yield: 71%;  $^1\text{H}$  NMR (400 MHz,  $\text{CDCl}_3$ )  $\delta$  8.31 (*d*,  $J = 6.8$  Hz, 1H), 7.86 (*d*,  $J = 2.0$  Hz, 1H), 7.50-7.54 (*m*, 2H), 7.29-7.32 (*m*, 1H), 7.14-7.18 (*m*, 1H), 6.77-6.80 (*m*, 1H), 3.61 (*s*, 1H), 3.23 (*s*, 1H), 0.92 (*s*, 9H);  $^{13}\text{C}$  NMR (100 MHz,  $\text{CDCl}_3$ )  $\delta$

142.4, 140.3, 137.2, 134.5, 131.0, 127.7, 125.6, 124.5, 123.8, 118.5, 117.4, 111.4, 83.5, 80.5, 56.0, 29.8.

*N*-(*tert*-Butyl)-2-(5-chloro-2-ethynylphenyl)-8-methylimidazo[1,2-*a*]pyridin-3-amine (**4n**)

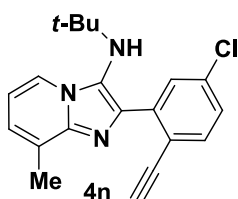

Yield: 47%;  $^1\text{H}$  NMR (300 MHz,  $\text{CDCl}_3$ )  $\delta$  8.19 (*d*,  $J = 6.9$  Hz, 1H), 7.88 (*d*,  $J = 2.1$  Hz, 1H), 7.51 (*d*,  $J = 8.1$  Hz, 1H), 7.30 (*dd*,  $J = 2.1, 8.1$  Hz, 1H), 6.97 (*d*,  $J = 6.9$  Hz, 1H), 6.71 (*t*,  $J = 6.9$  Hz, 1H), 3.59 (*s*, 1H), 3.22 (*s*, 1H), 2.62 (*s*,

3H), 0.92 (*s*, 9H);  $^{13}\text{C}$  NMR (75 MHz,  $\text{CDCl}_3$ )  $\delta$  142.6, 140.5, 136.6, 135.4, 134.3, 131.2, 127.6, 127.0, 125.8, 123.2, 121.7, 118.5, 114.4, 83.4, 80.4, 55.8, 29.8, 16.6.

*N*-(*tert*-Butyl)-6-(5-chloro-2-ethynylphenyl)imidazo[2,1-*b*]thiazol-5-amine (**4o**)

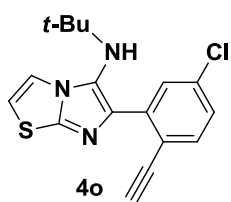

Yield: 54%; <sup>1</sup>H NMR (400 MHz, CDCl<sub>3</sub>) δ 7.77 (*d*, *J* = 2.0 Hz, 1H), 7.48 (*d*, *J* = 8.4 Hz, 1H), 7.43 (*d*, *J* = 4.4 Hz, 1H), 7.24-7.27 (*m*, 1H), 6.76 (*d*, *J* = 4.4 Hz, 1H), 3.69 (*s*, 1H), 3.28 (*s*, 1H), 0.92 (*s*, 9H); <sup>13</sup>C NMR (100 MHz, CDCl<sub>3</sub>) δ

145.8, 139.9, 137.5, 135.4, 134.5, 130.7, 127.7, 127.4, 118.0, 117.7, 111.9, 83.6, 80.7, 55.5, 29.7.

*N*-(*tert*-Butyl)-2-(5-chloro-2-ethynylphenyl)imidazo[1,2-*a*]pyrazin-3-amine (**4p**)

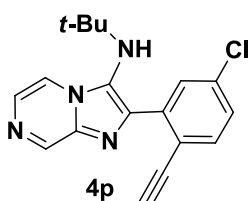

Yield: 95%; <sup>1</sup>H NMR (400 MHz, CDCl<sub>3</sub>) δ 8.99 (*d*, *J* = 1.6 Hz, 1H), 8.20-8.21 (*m*, 1H), 7.87 (*dd*, *J* = 2.4, 4.8 Hz, 1H), 7.82 (*t*, *J* = 2.0 Hz, 1H), 7.53 (*dd*, *J* = 2.0, 8.4 Hz, 1H), 7.33-7.36 (*m*, 1H), 3.67 (*s*, 1H), 3.24 (*s*, 1H), 0.92 (*s*, 9H); <sup>13</sup>C NMR (100 MHz, CDCl<sub>3</sub>) δ 143.7, 139.9, 139.2, 137.6, 135.7,

134.6, 131.0, 128.9, 128.5, 127.0, 118.7, 116.7, 83.0, 81.1, 56.5, 29.8.

*N*-(*tert*-Butyl)-2-(2-ethynyl-4-fluorophenyl)-6-methylimidazo[1,2-*a*]pyridin-3-amine (**4q**)

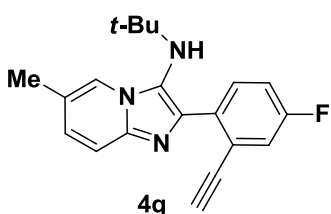

Yield: 74%; <sup>1</sup>H NMR (300 MHz, CDCl<sub>3</sub>) δ 8.09 (*s*, 1H), 7.76-7.81 (*m*, 1H), 7.43 (*d*, *J* = 9.0 Hz, 1H), 7.28 (*dd*, *J* = 2.4, 9.0 Hz, 1H), 7.16-7.23 (*m*, 1H), 7.01 (*dd*, *J* = 1.2, 8.4 Hz, 1H), 3.52 (*s*, 1H), 3.20 (*s*, 1H), 2.35

(*s*, 3H), 0.91 (*s*, 9H); <sup>13</sup>C NMR (75 MHz, CDCl<sub>3</sub>) δ 163.2, 159.9, 141.3, 137.4, 135.1, 132.9, 132.8, 127.4, 124.8, 121.4, 121.3, 120.8, 119.6, 119.2, 117.2, 116.9, 116.6, 83.1, 80.3, 55.8, 29.7, 18.4.

*N*-(*tert*-Butyl)-2-(2-ethynyl-4-fluorophenyl)-8-methylimidazo[1,2-*a*]pyridin-3-amine (**4r**)

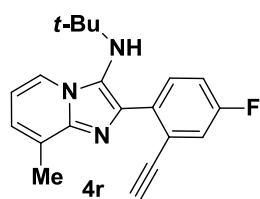

Yield: 43%;  $^1\text{H}$  NMR (300 MHz,  $\text{CDCl}_3$ )  $\delta$  8.19 (*d*,  $J = 6.6$  Hz, 1H), 7.85 (*dd*,  $J = 6.0, 8.4$  Hz, 1H), 7.17-7.30 (*m*, 2H), 6.95 (*d*,  $J = 6.3$  Hz, 1H), 6.70 (*t*,  $J = 6.6$  Hz, 1H), 3.53 (*s*, 1H), 3.20 (*s*, 1H), 2.62 (*s*, 3H), 0.91 (*s*, 9H);  $^{13}\text{C}$

NMR (75 MHz,  $\text{CDCl}_3$ )  $\delta$  163.2, 159.9, 142.5, 137.0, 135.2, 133.2, 133.1, 126.9, 125.5, 123.0, 121.6, 121.5, 119.5, 119.2, 117.3, 117.0, 111.3, 83.0, , 80.3, 55.7, 29.8, 16.6.

*N*-(*tert*-Butyl)-6-(2-ethynyl-5-fluorophenyl)imidazo[2,1-*b*]thiazol-5-amine (**4s**)

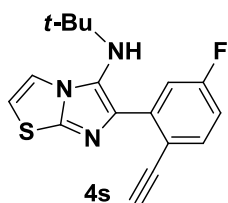

Yield: 57%;  $^1\text{H}$  NMR (400 MHz,  $\text{CDCl}_3$ )  $\delta$  7.42-7.55 (*m*, 3H), 6.97-7.01 (*m*, 1H), 6.75 (*d*,  $J = 4.8$  Hz, 1H), 3.72-3.75 (*m*, 1H), 3.22 (*s*, 1H), 0.92 (*s*, 9H);  $^{13}\text{C}$

NMR (100 MHz,  $\text{CDCl}_3$ )  $\delta$  164.1, 161.6, 145.8, 140.9, 140.8, 137.7, 135.4, 135.3, 118.0, 117.6, 117.3, 115.4, 114.8, 114.6, 111.8, 83.6, 79.6, 55.5, 29.7.

5-Methylpyrido[2',1':2,3]imidazo[4,5-*c*]isoquinoline (**6a**)

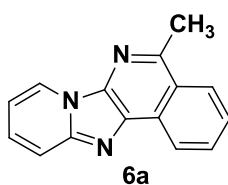

Yield = 83%;  $^1\text{H}$  NMR (300 MHz,  $\text{CDCl}_3$ )  $\delta$  8.93 (*d*,  $J = 6.9$  Hz, 1H), 8.81 (*d*,  $J = 8.1$  Hz, 1H), 8.33 (*d*,  $J = 8.4$  Hz, 2H), 7.82-7.94 (*m*, 2H), 7.70-7.75 (*m*, 1H), 7.47-7.53 (*m*, 1H), 7.05 (*t*,  $J = 6.6$  Hz, 1H), 3.14 (*s*, 3H);  $^{13}\text{C}$  NMR (75 MHz,

$\text{CDCl}_3$ )  $\delta$  152.6, 130.2, 129.7, 128.3, 126.8, 126.3, 123.7, 122.6, 117.7, 111.3, 22.8; HRMS ( $m/z$ ) calc. for  $\text{C}_{15}\text{H}_{12}\text{N}_3$  (+) 234.1031, found 234.1025.



5,9-Dimethylpyrido[2',1':2,3]imidazo[4,5-*c*]isoquinoline (**6b**)

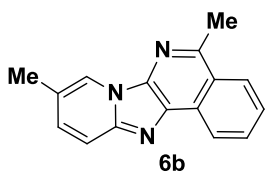

Yield = 72%;  $^1\text{H NMR}$  (300 MHz,  $\text{CDCl}_3$ )  $\delta$  8.79 (*d*,  $J = 8.1$  Hz, 1H), 8.69 (*s*, 1H), 8.30 (*d*,  $J = 8.4$  Hz, 1H), 7.91 (*t*,  $J = 7.2$  Hz, 1H), 7.67-7.86 (*m*, 2H), 7.28-7.36 (*m*, 1H), 3.11 (*s*, 3H), 2.47 (*s*, 3H);  $^{13}\text{C NMR}$  (75 MHz,  $\text{CDCl}_3$ )  $\delta$

152.3, 145.0, 133.1, 131.7, 131.1, 130.2, 129.6, 128.9, 126.8, 122.6, 121.3, 121.2, 116.9, 22.8, 18.1;

HRMS ( $m/z$ ) calc. for  $\text{C}_{16}\text{H}_{14}\text{N}_3$  (+) 248.1188, found 248.1183.

9-Chloro-5-methylpyrido[2',1':2,3]imidazo[4,5-*c*]isoquinoline (**6c**)

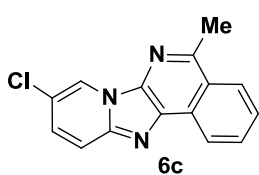

Yield = 75%;  $^1\text{H NMR}$  (300 MHz,  $\text{CDCl}_3$ )  $\delta$  8.92 (*d*,  $J = 1.2$  Hz, 1H), 8.75 (*d*,  $J = 8.1$  Hz, 1H), 8.30 (*d*,  $J = 8.4$  Hz, 1H), 7.87-7.92 (*m*, 1H), 7.69-7.76 (*m*, 2H), 7.43 (*dd*,  $J = 1.8, 9.6$  Hz, 1H), 3.12 (*s*, 3H);  $^{13}\text{C NMR}$  (100 MHz,  $\text{CDCl}_3$ )

$\delta$  153.6, 144.0, 131.8, 130.5, 129.5, 128.9, 127.0, 126.3, 122.6, 121.7, 119.7, 118.1, 109.5, 22.8;

HRMS ( $m/z$ ) calc. for  $\text{C}_{15}\text{H}_{11}\text{ClN}_3$  (+) 268.0642, found 268.0634.

5-Methylthiazolo[2',3':2,3]imidazo[4,5-*c*]isoquinoline (**6d**)

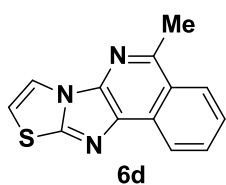

Yield = 61%;  $^1\text{H NMR}$  (300 MHz,  $\text{CDCl}_3$ )  $\delta$  8.63 (*d*,  $J = 8.1$  Hz, 1H), 8.26 (*d*,  $J = 8.4$  Hz, 1H), 8.06 (*d*,  $J = 3.9$  Hz, 1H), 7.88 (*t*,  $J = 7.2$  Hz, 1H), 7.66 (*t*,  $J = 7.5$  Hz, 1H), 6.97 (*d*,  $J = 3.6$  Hz, 1H), 3.08 (*s*, 3H);  $^{13}\text{C NMR}$  (75 MHz,  $\text{CDCl}_3$ )

$\delta$  151.8, 130.2, 129.7, 126.5, 125.5, 121.9, 117.1, 111.7, 22.5; HRMS ( $m/z$ ) calc. for  $\text{C}_{13}\text{H}_{10}\text{N}_3\text{S}$

(+) 240.0595, found 240.0593.

5-Methylpyrazino[2',1':2,3]imidazo[4,5-*c*]isoquinoline (**6e**)

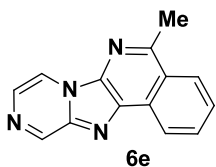

Yield = 63%;  $^1\text{H NMR}$  (300 MHz,  $\text{CDCl}_3$ )  $\delta$  9.37 (*d*,  $J = 1.5$  Hz, 1H), 8.74-8.82 (*m*, 2H), 8.34 (*d*,  $J = 8.4$  Hz, 1H), 8.12 (*d*,  $J = 4.5$  Hz, 1H), 7.90-8.00 (*m*, 1H), 7.78 (*t*,  $J = 6.9$  Hz, 1H), 3.13 (*s*, 3H);  $^{13}\text{C NMR}$  (75 MHz,  $\text{CDCl}_3$ )  $\delta$  156.1, 144.8,

141.8, 139.8, 131.0, 130.0, 128.4, 127.4, 127.1, 122.8, 116.3, 23.0; HRMS ( $m/z$ ) calc. for  $\text{C}_{14}\text{H}_{11}\text{N}_4$  (+) 235.0984, found 235.0971.

2-Methoxy-5-methylpyrido[2',1':2,3]imidazo[4,5-*c*]isoquinoline (**6f**)

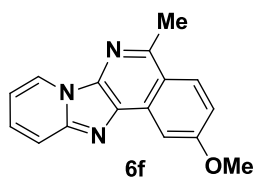

Yield = 78%;  $^1\text{H NMR}$  (300 MHz,  $\text{CDCl}_3$ )  $\delta$  8.90 (*d*,  $J = 6.6$  Hz, 1H), 8.21 (*d*,  $J = 9.3$  Hz, 1H), 8.08 (*d*,  $J = 2.4$  Hz, 1H), 7.85 (*d*,  $J = 9.0$  Hz, 1H), 7.50-7.70 (*m*, 2H), 6.99-7.03 (*m*, 1H), 4.09 (*s*, 3H), 3.08 (*s*, 3H);  $^{13}\text{C NMR}$  (75 MHz,  $\text{CDCl}_3$ )  $\delta$  161.1, 130.8, 128.8, 128.7, 123.8, 121.9, 118.5, 117.6, 111.3, 101.1, 55.8, 22.7; HRMS

( $m/z$ ) calc. for  $\text{C}_{16}\text{H}_{14}\text{N}_3\text{O}$  (+) 264.1137, found 264.1128.

2-Methoxy-5,11-dimethylpyrido[2',1':2,3]imidazo[4,5-*c*]isoquinoline (**6g**)

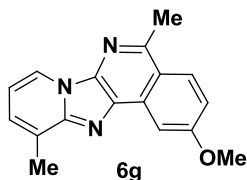

Yield = 80%;  $^1\text{H NMR}$  (300 MHz,  $\text{CDCl}_3$ )  $\delta$  8.77 (*d*,  $J = 6.9$  Hz, 1H), 8.13-8.20 (*m*, 2H), 7.25-7.29 (*m*, 2H), 6.93 (*t*,  $J = 6.9$  Hz, 1H), 4.12 (*s*, 3H), 3.07 (*s*, 3H), 2.80 (*s*, 3H);  $^{13}\text{C NMR}$  (75 MHz,  $\text{CDCl}_3$ )  $\delta$  161.0, 152.0, 131.9,

128.64, 127.3, 126.7, 121.8, 118.2, 111.2, 101.4, 55.8, 22.7, 17.1; HRMS ( $m/z$ ) calc. for  $\text{C}_{17}\text{H}_{16}\text{N}_3\text{O}$  (+) 278.1293, found 278.1288.

2-Methoxy-5-methylthiazolo[2',3':2,3]imidazo[4,5-*c*]isoquinoline (**6h**)

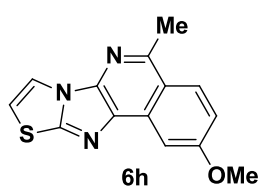

Yield = 56%;  $^1\text{H NMR}$  (300 MHz,  $\text{CDCl}_3$ )  $\delta$  8.12 (*d*,  $J = 9.3$  Hz, 1H), 8.04 (*d*,  $J = 4.5$  Hz, 1H), 7.85 (*d*,  $J = 2.1$  Hz, 1H), 7.22 (*dd*,  $J = 2.4, 9.0$  Hz, 1H), 6.93 (*d*,  $J = 4.5$  Hz, 1H), 4.04 (*s*, 3H), 3.00 (*s*, 3H);  $^{13}\text{C NMR}$  (75 MHz,

$\text{CDCl}_3$ )  $\delta$  161.0, 153.0, 151.4, 136.6, 133.7, 131.6, 128.4, 120.7, 118.0, 117.2, 111.6, 100.0, 55.7, 22.4; HRMS ( $m/z$ ) calc. for  $\text{C}_{14}\text{H}_{12}\text{N}_3\text{OS}$  (+) 270.0701, found 270.0694.

2-Methoxy-5-methylpyrazino[2',1':2,3]imidazo[4,5-*c*]isoquinoline (**6i**)

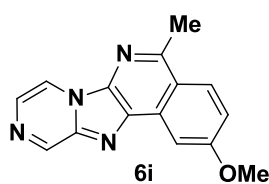

Yield = 58%;  $^1\text{H NMR}$  (300 MHz,  $\text{CDCl}_3$ )  $\delta$  9.35 (*d*,  $J = 1.5$  Hz, 1H), 8.74 (*dd*,  $J = 1.5, 4.5$  Hz, 1H), 8.23 (*d*,  $J = 9.0$  Hz, 1H), 8.07-8.10 (*m*, 2H), 7.36 (*dd*,  $J = 2.7, 9.0$  Hz, 1H), 4.10 (*s*, 3H), 3.08 (*s*, 3H);  $^{13}\text{C NMR}$  (75 MHz,

$\text{CDCl}_3$ )  $\delta$  161.7, 155.6, 144.7, 139.5, 132.21, 132.0, 129.0, 128.2, 122.3, 119.1, 116.4, 101.6, 55.9, 22.9; HRMS ( $m/z$ ) calc. for  $\text{C}_{15}\text{H}_{13}\text{N}_4\text{O}$  (+) 265.1089, found 265.1083.

9-Bromo-3,5-dimethylpyrido[2',1':2,3]imidazo[4,5-*c*]isoquinoline (**6j**)

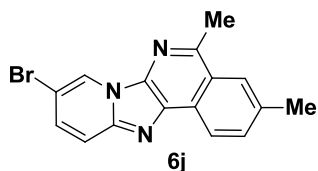

Yield = 78%;  $^1\text{H NMR}$  (400 MHz,  $\text{CDCl}_3$ )  $\delta$  8.97 (*s*, 1H), 8.62 (*d*,  $J = 8.4$  Hz, 1H), 8.03 (*s*, 1H), 7.68-7.73 (*m*, 2H), 7.47-7.50 (*m*, 1H), 3.07 (*s*, 3H), 2.64 (*s*, 3H);  $^{13}\text{C NMR}$  (75 MHz,  $\text{CDCl}_3$ )  $\delta$  153.1, 143.9, 136.5,

133.8, 132.4, 131.6, 131.2, 127.5, 127.1, 126.1, 123.8, 122.4, 118.3, 105.7, 22.8, 22.1; HRMS ( $m/z$ ) calc. for  $\text{C}_{16}\text{H}_{13}\text{BrN}_3$  (+) 326.0293, found 326.0300.

3,5,9-Trimethylpyrido[2',1':2,3]imidazo[4,5-*c*]isoquinoline (**6k**)

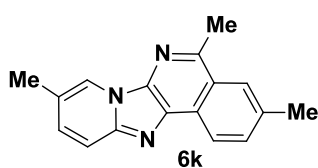

Yield = 87%; <sup>1</sup>H NMR (400 MHz, CDCl<sub>3</sub>) δ 8.64 (*s*, 1H), 8.02 (*s*, 1H), 7.71 (*t*, *J* = 8.8 Hz, 2H), 7.31 (*d*, *J* = 9.2 Hz, 1H), 3.07 (*s*, 3H), 2.63 (*s*, 3H), 2.45 (*s*, 3H); <sup>13</sup>C NMR (100 MHz, CDCl<sub>3</sub>) δ 151.7, 145.0, 135.9,

134.1, 132.1, 131.4, 131.3, 127.6, 126.9, 126.0, 122.4, 121.2, 120.9, 116.9, 22.8, 22.0, 18.1; HRMS (*m/z*) calc. for C<sub>17</sub>H<sub>16</sub>N<sub>3</sub> (+) 262.1344, found 262.1341.

3,5,11-Trimethylpyrido[2',1':2,3]imidazo[4,5-*c*]isoquinoline (**6l**)

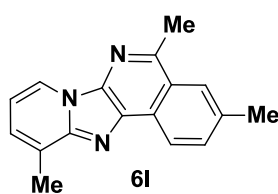

Yield = 79%; <sup>1</sup>H NMR (300 MHz, CDCl<sub>3</sub>) δ 8.73 (*m*, 2H), 8.03 (*s*, 1H), 7.71 (*dd*, *J* = 1.2, 8.4 Hz, 1H), 7.25 (*d*, *J* = 6.6 Hz, 1H), 6.90 (*t*, *J* = 6.6 Hz, 1H), 3.09 (*s*, 3H), 2.79 (*s*, 3H), 2.64 (*s*, 3H); <sup>13</sup>C NMR (75 MHz, CDCl<sub>3</sub>) δ

151.8, 146.3, 135.9, 134.7, 131.9, 131.0, 129.1, 128.6, 127.7, 127.3, 126.7, 122.6, 121.4, 111.2, 22.8, 22.0, 17.1; HRMS (*m/z*) calc. for C<sub>17</sub>H<sub>16</sub>N<sub>3</sub> (+) 262.1344, found 262.1335.

2-Chloro-5-methylpyrido[2',1':2,3]imidazo[4,5-*c*]isoquinoline (**6m**)

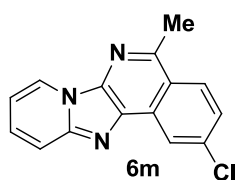

Yield = 48%; <sup>1</sup>H NMR (300 MHz, CDCl<sub>3</sub>) δ 8.89 (*d*, *J* = 6.6 Hz, 1H), 8.76 (*s*, 1H), 8.22 (*d*, *J* = 9.0 Hz, 1H), 7.86 (*d*, *J* = 6.9 Hz, 1H), 7.63 (*d*, *J* = 8.7 Hz, 1H), 7.51-7.56 (*m*, 1H), 7.05 (*t*, *J* = 6.6 Hz, 1H), 3.10 (*s*, 3H); <sup>13</sup>C NMR (75 MHz,

CDCl<sub>3</sub>) δ 136.7, 129.1, 128.7, 128.6, 128.4, 127.0, 125.0, 123.8, 122.0, 117.8, 111.6, 22.7; HRMS (*m/z*) calc. for C<sub>15</sub>H<sub>11</sub>ClN<sub>3</sub> (+) 268.0642, found 268.0635.

2-Chloro-5,11-dimethylpyrido[2',1':2,3]imidazo[4,5-*c*]isoquinoline (**6n**)

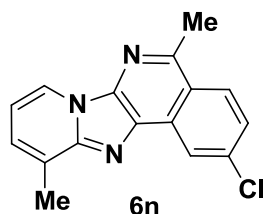

Yield = 55%;  $^1\text{H}$  NMR (300 MHz,  $\text{CDCl}_3$ )  $\delta$  8.80-8.72 (*m*, 2H), 8.17 (*d*,  $J$  = 7.5 Hz, 1H), 7.28-7.60 (*m*, 2H), 6.92 (*s*, 1H), 3.07 (*s*, 3H), 2.78 (*s*, 3H);  $^{13}\text{C}$

NMR (75 MHz,  $\text{CDCl}_3$ )  $\delta$  152.1, 146.8, 136.4, 135.5, 130.6, 130.4, 128.3, 127.6, 127.1, 126.8, 124.8, 122.0, 121.4, 111.5, 22.7, 17.1; HRMS ( $m/z$ ) calc. for  $\text{C}_{16}\text{H}_{13}\text{ClN}_3$  (+) 282.0798, found 282.0791.

2-Chloro-5-methylthiazolo[2',3':2,3]imidazo[4,5-*c*]isoquinoline (**6o**)

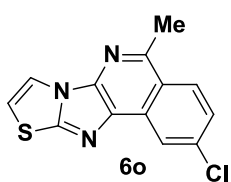

Yield = 62%;  $^1\text{H}$  NMR (300 MHz,  $\text{CDCl}_3$ )  $\delta$  8.56 (*d*,  $J$  = 1.8 Hz, 1H), 8.15 (*d*,  $J$  = 9.0 Hz, 1H), 8.03 (*d*,  $J$  = 4.5 Hz, 1H), 7.55 (*dd*,  $J$  = 2.4, 8.7 Hz, 1H), 6.98 (*d*,  $J$  = 4.5 Hz, 1H), 3.03 (*s*, 3H);  $^{13}\text{C}$  NMR (75 MHz,  $\text{CDCl}_3$ )  $\delta$  153.8, 151.6,

136.7, 136.6, 133.1, 130.3, 128.2, 123.6, 121.1, 117.0, 112.1, 22.4; HRMS ( $m/z$ ) calc. for  $\text{C}_{13}\text{H}_9\text{ClN}_3\text{S}$  (+) 274.0206, found 274.0198.

2-Chloro-5-methylpyrazino[2',1':2,3]imidazo[4,5-*c*]isoquinoline (**6p**)

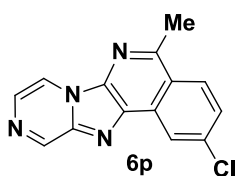

Yield = 63%;  $^1\text{H}$  NMR (300 MHz,  $\text{CDCl}_3$ )  $\delta$  9.39 (*d*,  $J$  = 1.2 Hz, 1H), 8.76-8.82 (*m*, 2H), 8.30 (*d*,  $J$  = 9.0 Hz, 1H), 8.15 (*d*,  $J$  = 4.5 Hz, 1H), 7.75 (*dd*,  $J$  = 2.4, 9.0 Hz, 1H), 3.13 (*s*, 3H);  $^{13}\text{C}$  NMR (75 MHz,  $\text{CDCl}_3$ )  $\delta$  145.0, 128.8,

128.5, 128.1, 122.3, 116.4, 29.2; HRMS ( $m/z$ ) calc. for  $\text{C}_{14}\text{H}_{10}\text{ClN}_4$  (+) 269.0594, found 269.0592.

3-Fluoro-5,9-dimethylpyrido[2',1':2,3]imidazo[4,5-*c*]isoquinoline (**6q**)

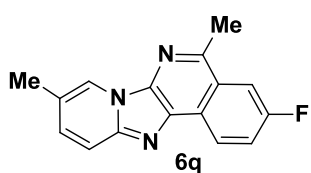

Yield = 58%;  $^1\text{H}$  NMR (300 MHz,  $\text{CDCl}_3$ )  $\delta$  8.71 (*d*,  $J$  = 8.1 Hz, 1H), 8.61 (*s*, 1H), 7.81 (*d*,  $J$  = 10.2 Hz, 1H), 7.70 (*d*,  $J$  = 9.0 Hz, 1H), 7.59 (*t*,  $J$  = 7.8 Hz, 1H), 7.33 (*d*,  $J$  = 9.0 Hz, 1H), 3.02 (*s*, 3H), 2.45 (*s*, 3H);  $^{13}\text{C}$

NMR (75 MHz,  $\text{CDCl}_3$ )  $\delta$  162.0, 158.8, 151.0, 145.2, 134.2, 131.8, 128.8, 127.6, 126.3, 125.0, 121.2, 119.9, 116.9, 110.9, 22.7, 18.1; HRMS ( $m/z$ ) calc. for  $\text{C}_{16}\text{H}_{13}\text{FN}_3$  (+) 266.1094 found 266.1091.

3-Fluoro-5,11-dimethylpyrido[2',1':2,3]imidazo[4,5-*c*]isoquinoline (**6r**)

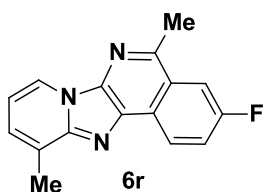

Yield = 67%;  $^1\text{H}$  NMR (300 MHz,  $\text{CDCl}_3$ )  $\delta$  8.82 (*dd*,  $J$  = 5.7, 9.0 Hz, 1H), 8.75 (*d*,  $J$  = 6.6 Hz, 1H), 7.86 (*dd*,  $J$  = 2.4, 10.5 Hz, 1H), 7.59-7.66 (*m*, 1H), 7.14 (*d*,  $J$  = 6.9 Hz, 1H), 6.93 (*t*,  $J$  = 6.9 Hz, 1H), 3.06 (*s*, 3H), 2.78 (*s*, 3H);

$^{13}\text{C}$  NMR (75 MHz,  $\text{CDCl}_3$ )  $\delta$  151.2, 146.5, 129.1, 128.6, 128.1, 127.4, 126.4, 125.4, 121.5, 119.8, 119.5, 111.5, 110.9, 22.7, 17.1; HRMS ( $m/z$ ) calc. for  $\text{C}_{16}\text{H}_{13}\text{FN}_3$  (+) 266.1094, found 266.1089.

2-Fluoro-5-methylthiazolo[2',3':2,3]imidazo[4,5-*c*]isoquinoline (**6s**)

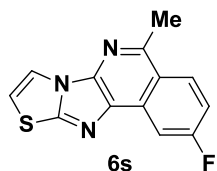

Yield = 59%;  $^1\text{H}$  NMR (300 MHz,  $\text{CDCl}_3$ )  $\delta$  8.60 (*dd*,  $J$  = 5.4, 8.7 Hz, 1H), 8.05 (*d*,  $J$  = 4.5 Hz, 1H), 7.81-7.86 (*m*, 1H), 7.59-7.65 (*m*, 1H), 6.98 (*d*,  $J$  = 4.5 Hz, 1H), 3.02 (*s*, 3H);  $^{13}\text{C}$  NMR (75 MHz,  $\text{CDCl}_3$ )  $\delta$  161.6, 158.3, 153.8, 150.6, 130.8,

129.8, 128.9, 126.5, 124.5, 120.4, 117.1, 111.9, 110.6, 22.5; HRMS ( $m/z$ ) calc. for  $\text{C}_{13}\text{H}_9\text{FN}_3\text{S}$  (+) 258.0501, found 258.0498.

# $^1\text{H}$ NMR and $^{13}\text{C}$ NMR spectra

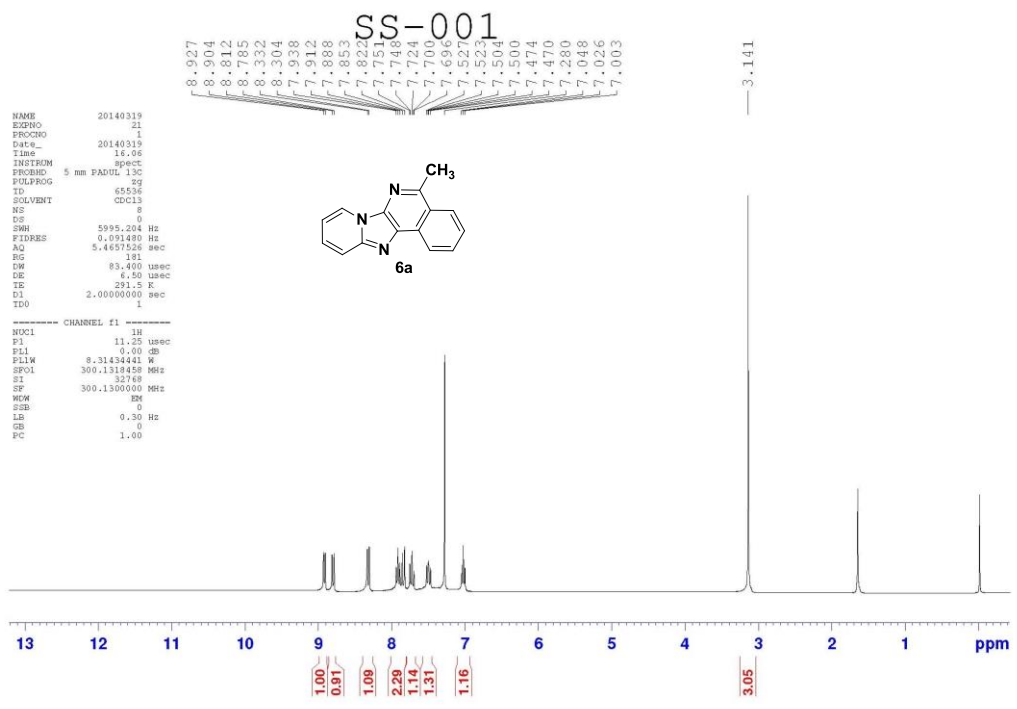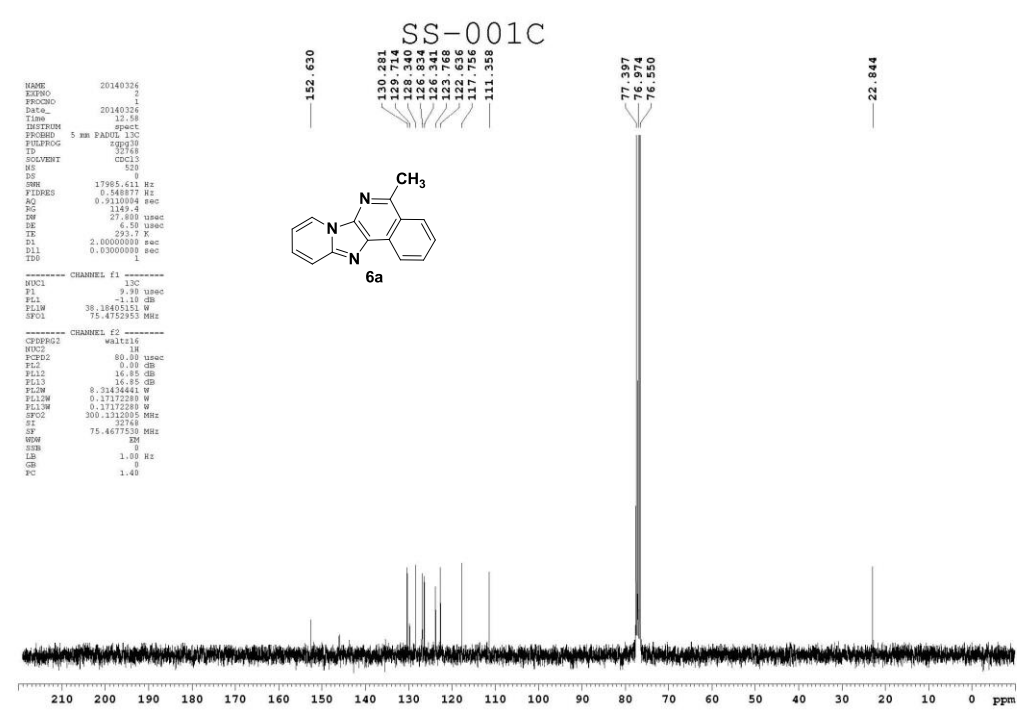

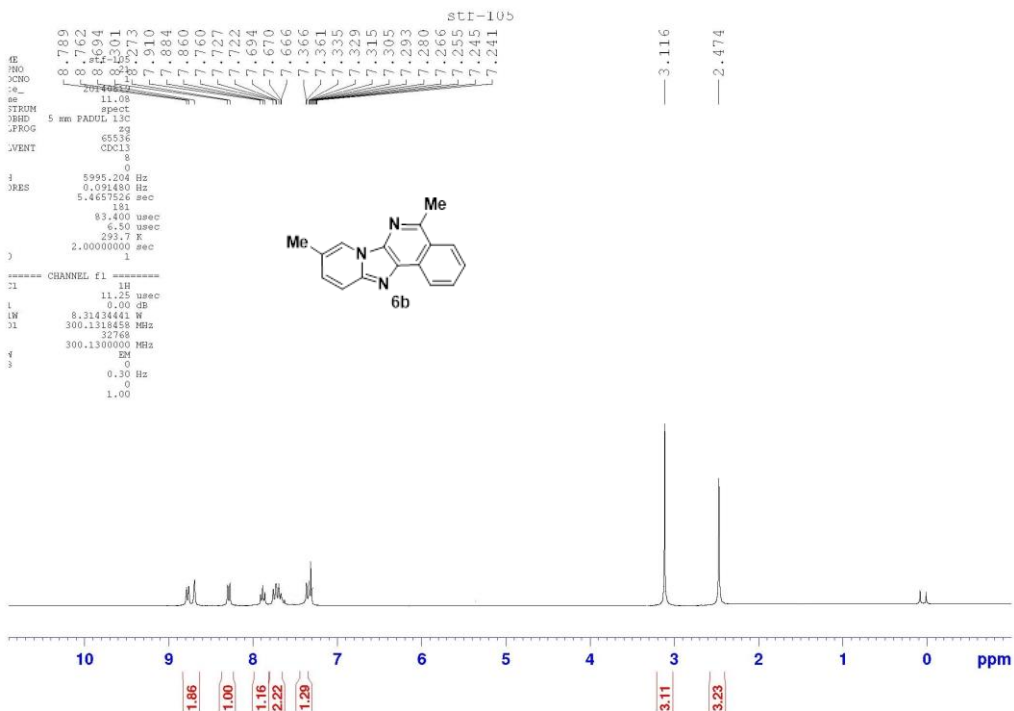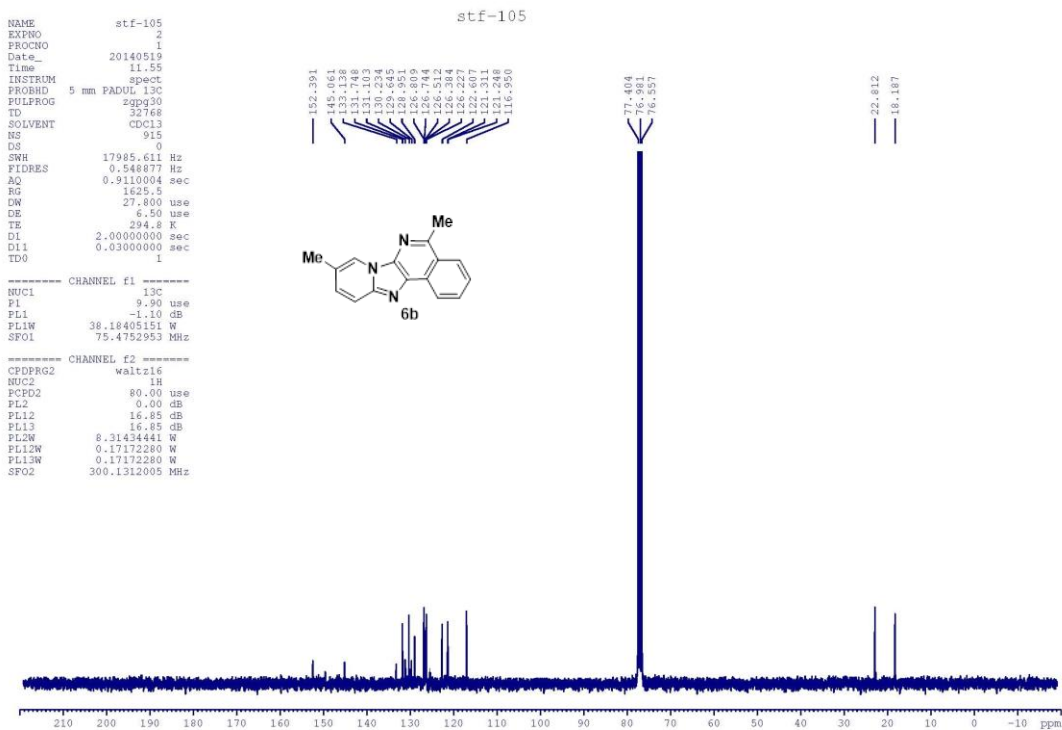



```

NAME          stf-104
EXPNO         2
PROCNO        1
Date_         20140516
Time          13.15
INSTRUM       spect
PROBHD        5 mm PABBO 13C
PULPROG       zgpg30
TD            65536
SOLVENT       CDCl3
NS            8
DS            4
SWH           5995.204 Hz
FIDRES        0.931480 Hz
AQ           1.91
RG           83.400 usec
DE           6.50 usec
TE           299.6 K
D1           2.0000000 sec
D11           1
----- CHANNEL f1 -----
NUC1          13C
P1           11.25 usec
PL1          0.00 dB
PL12         8.31434441 W
SFO1         300.1314958 MHz
SI           32768
SF           300.1300000 MHz
WDW          EM
SSB          0
LB           0.30 Hz
GB           0
PC           1.00

```

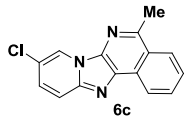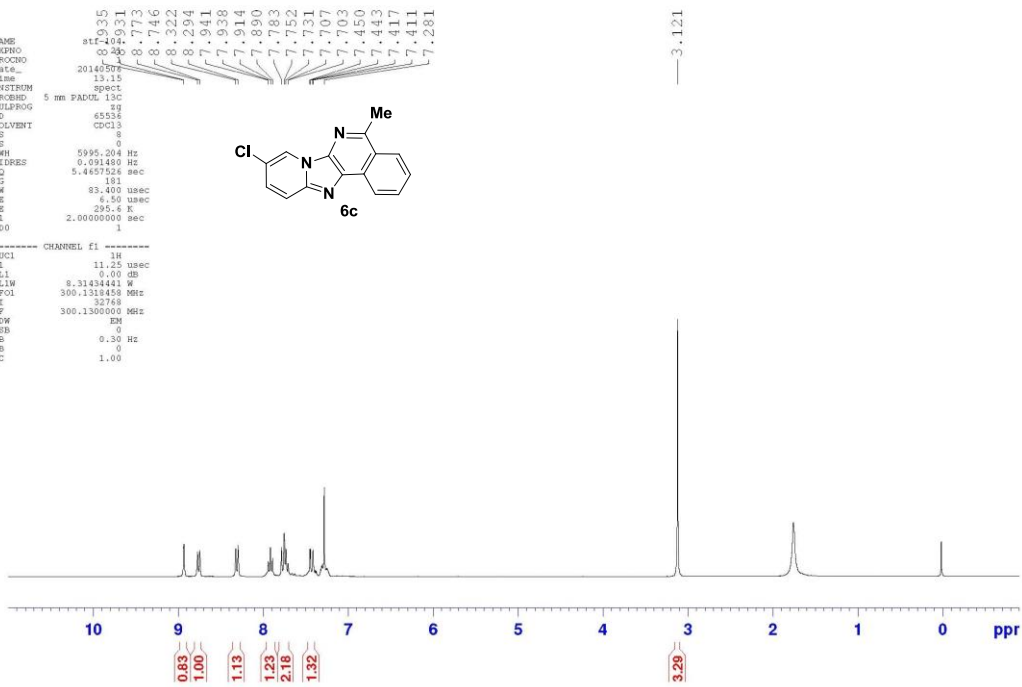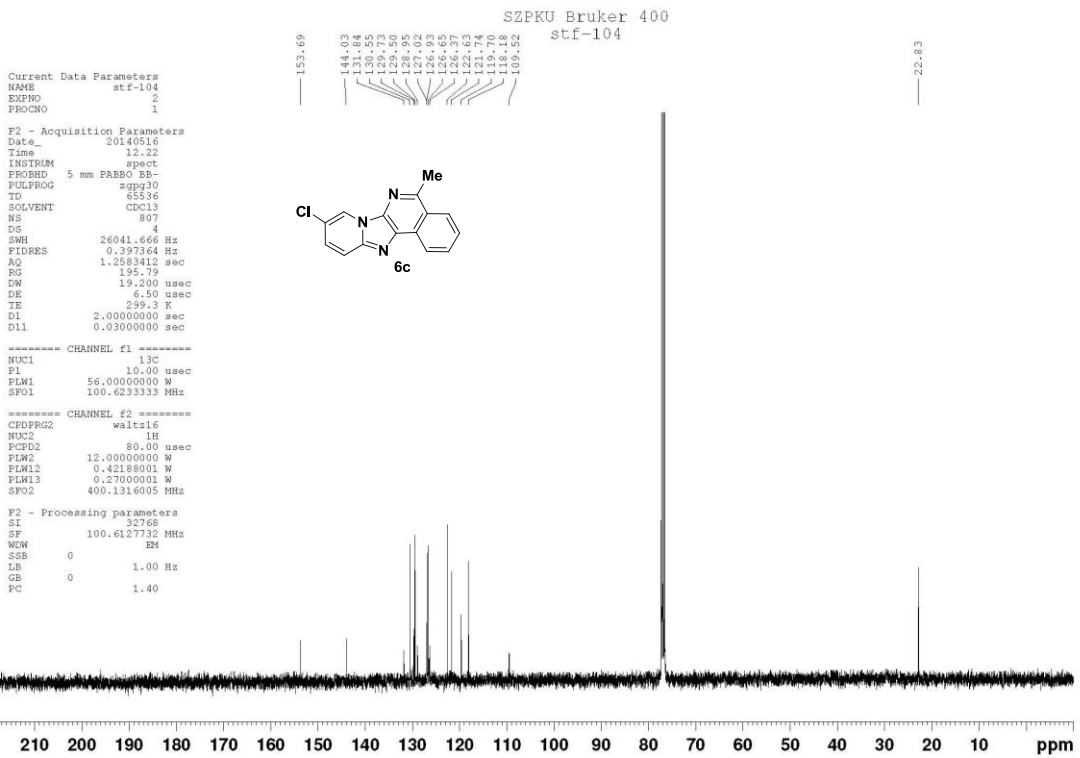

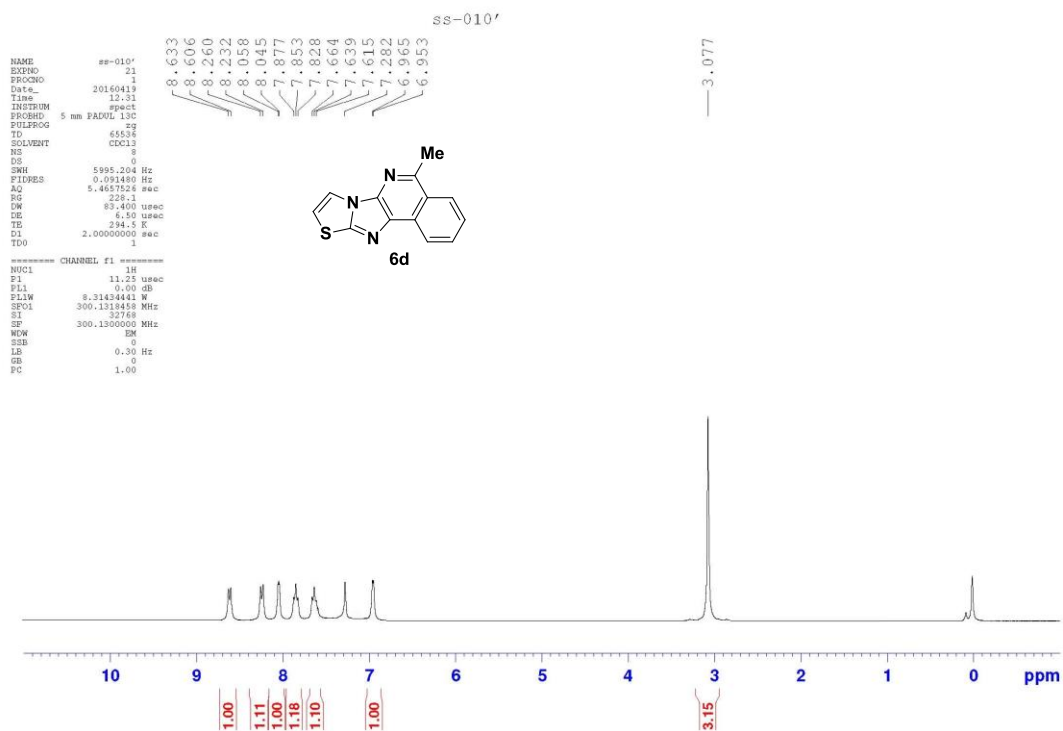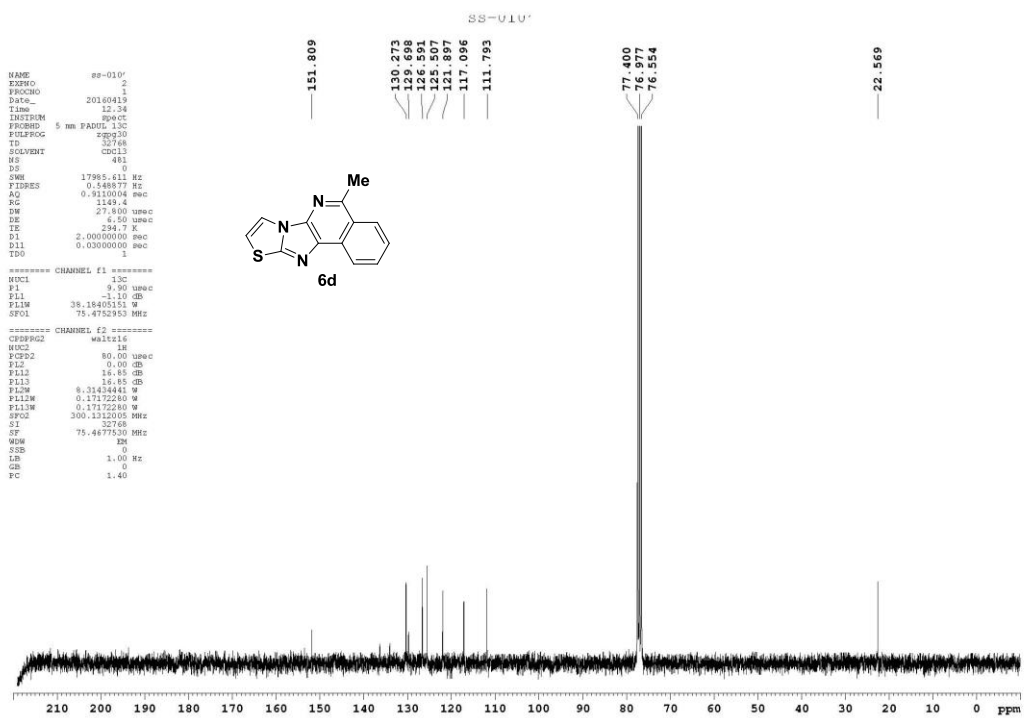

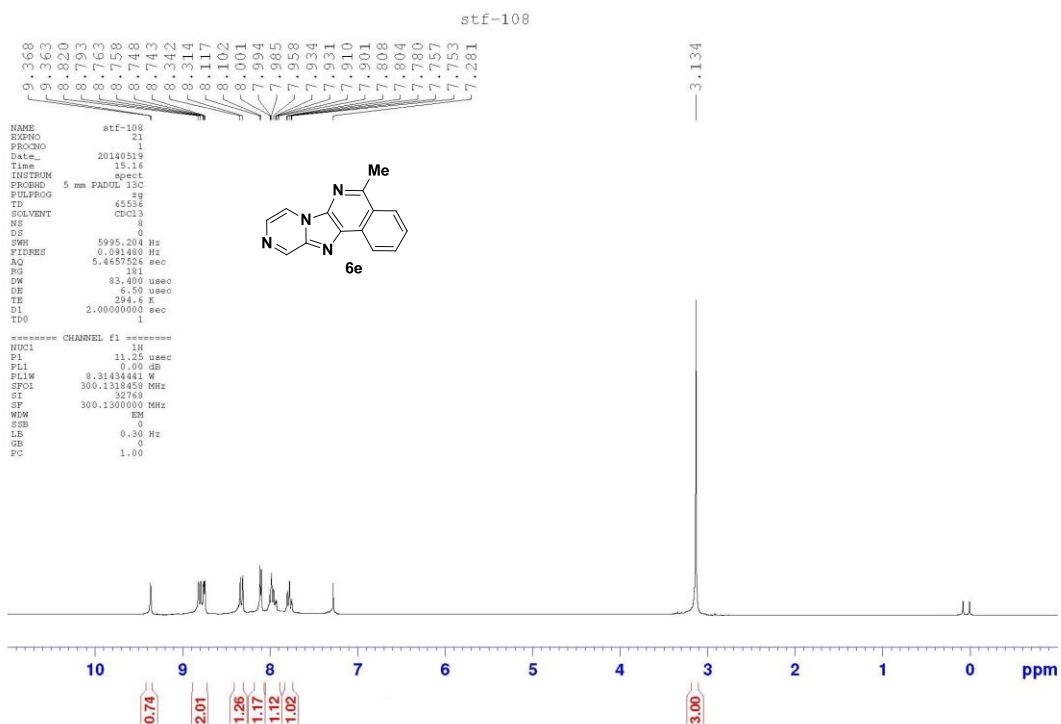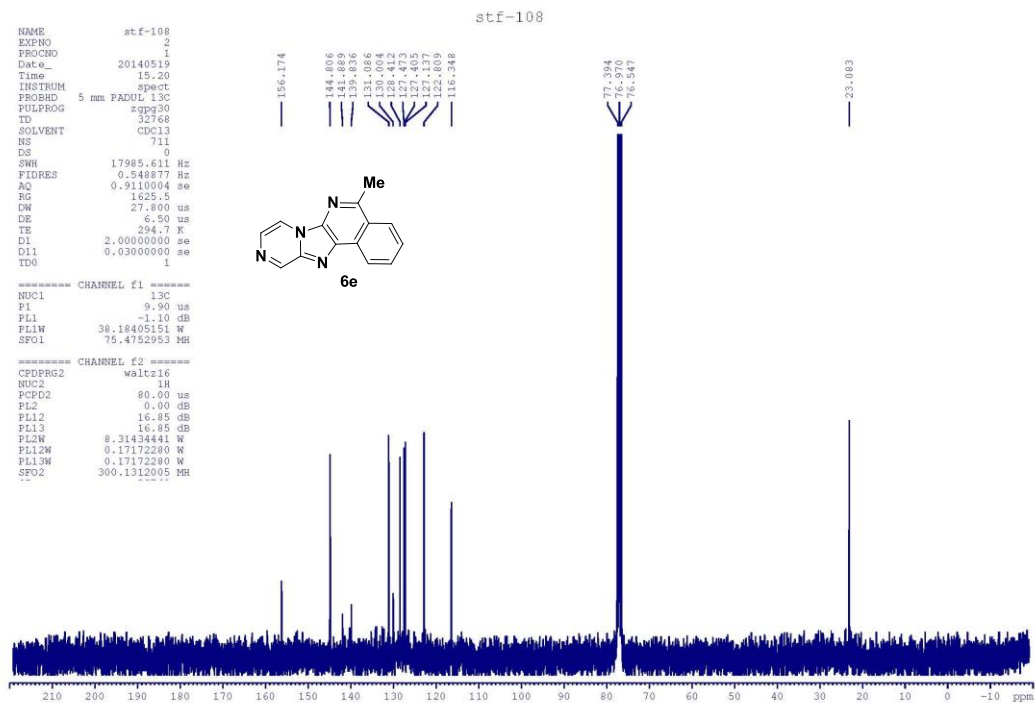

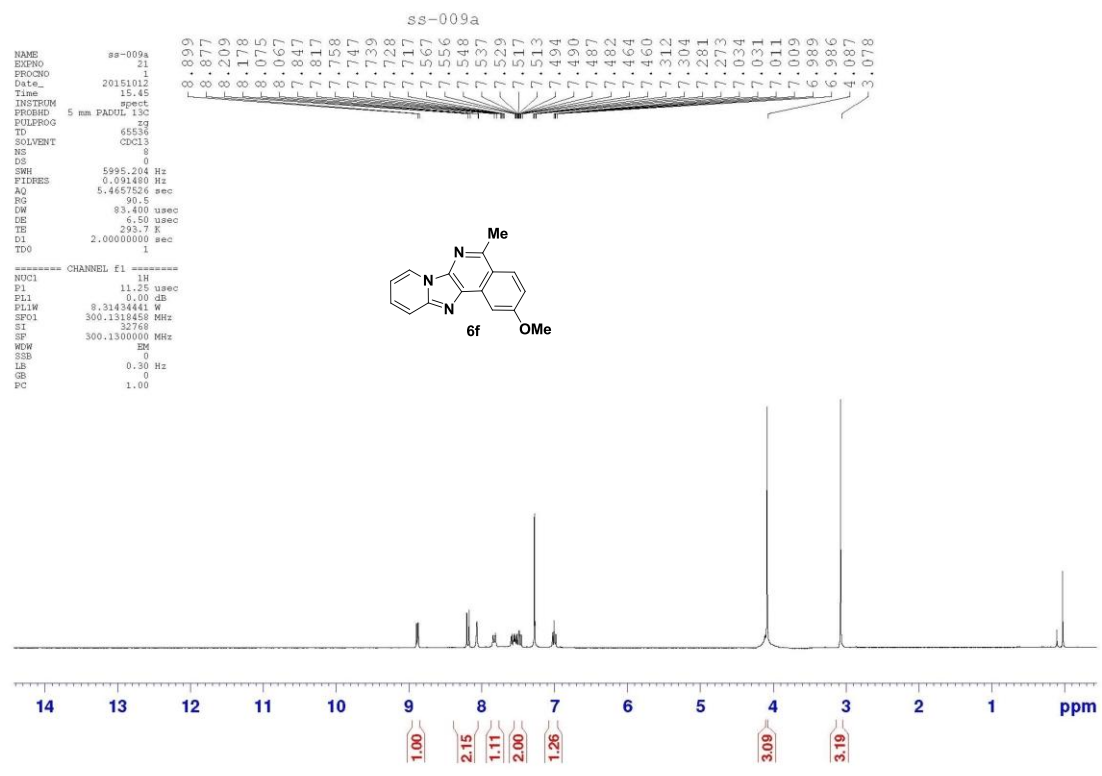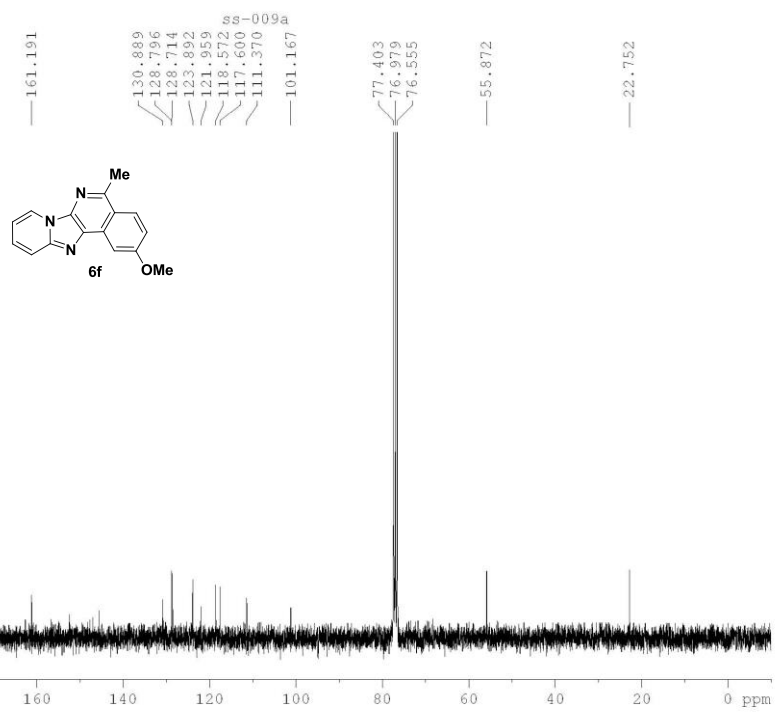

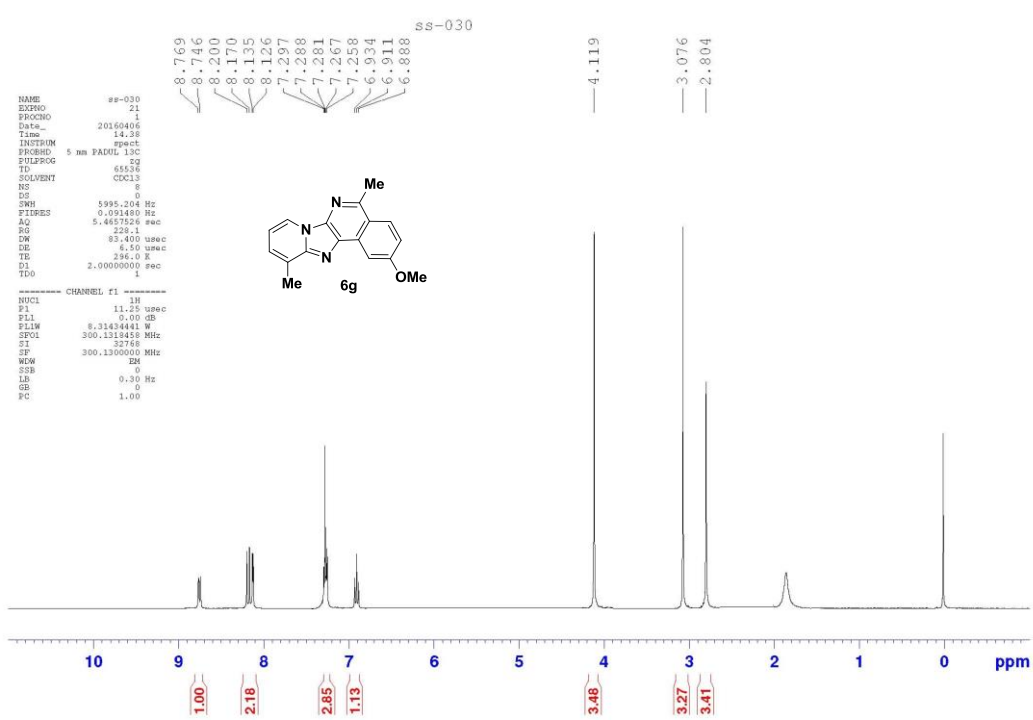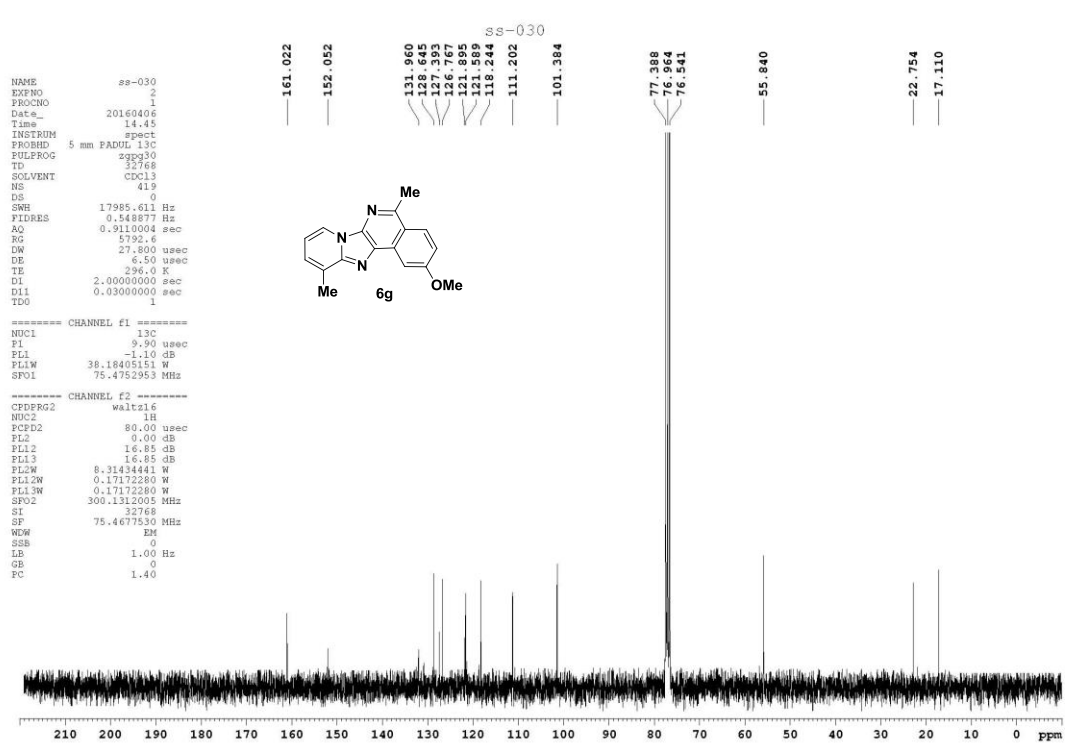

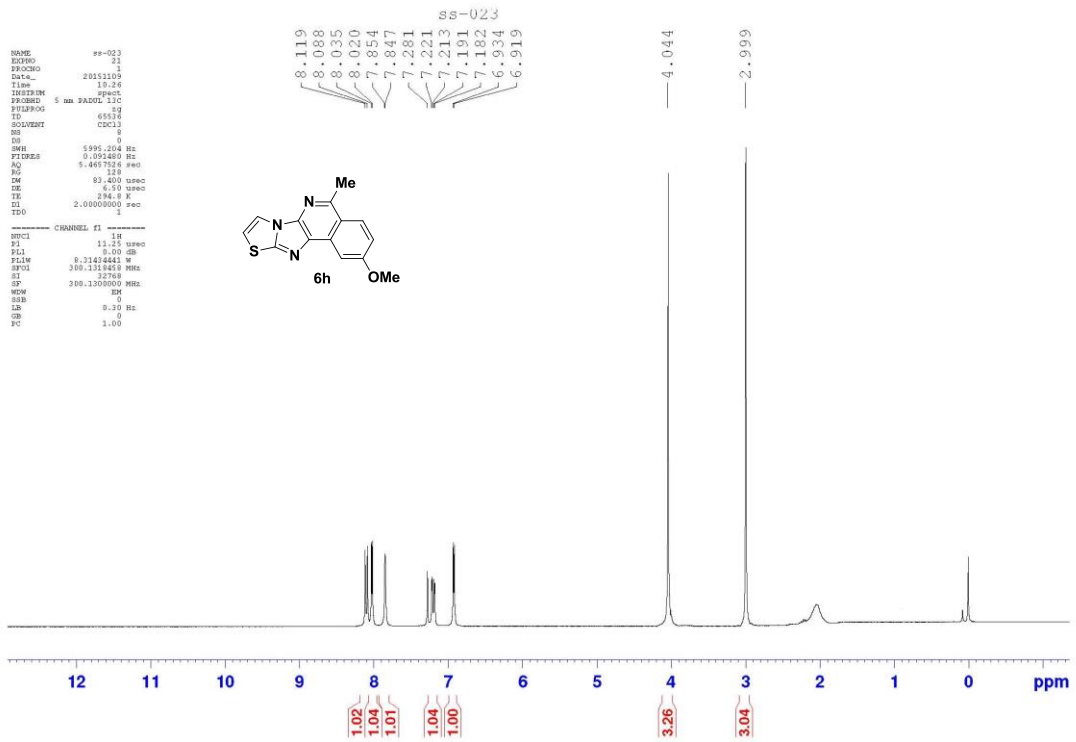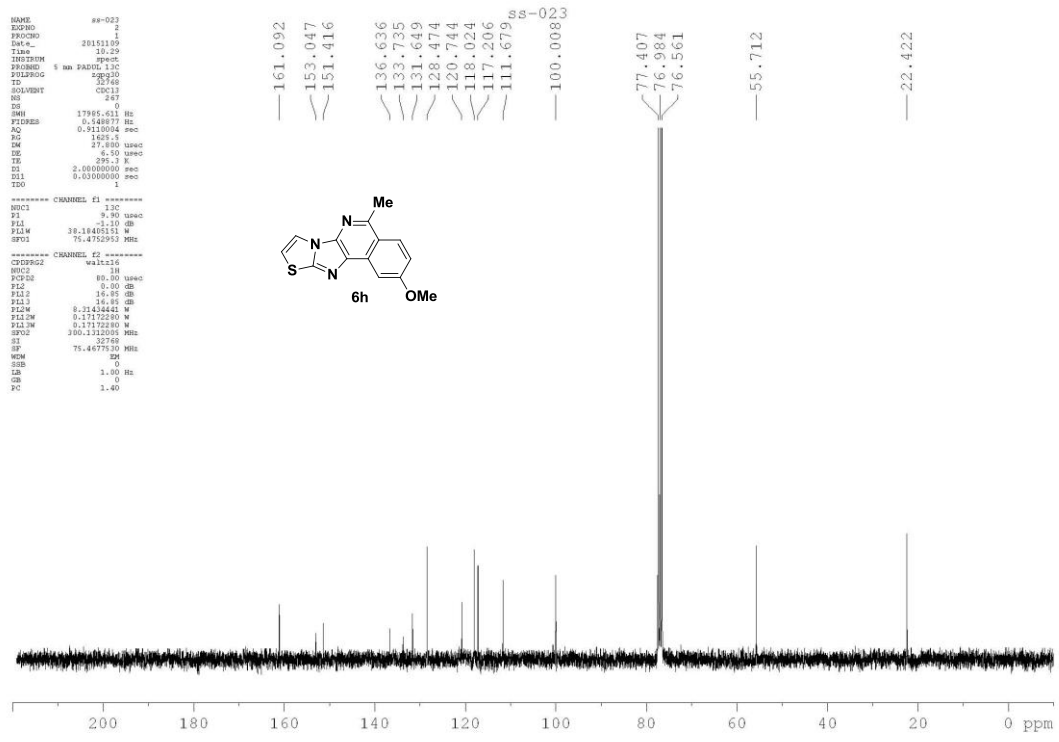

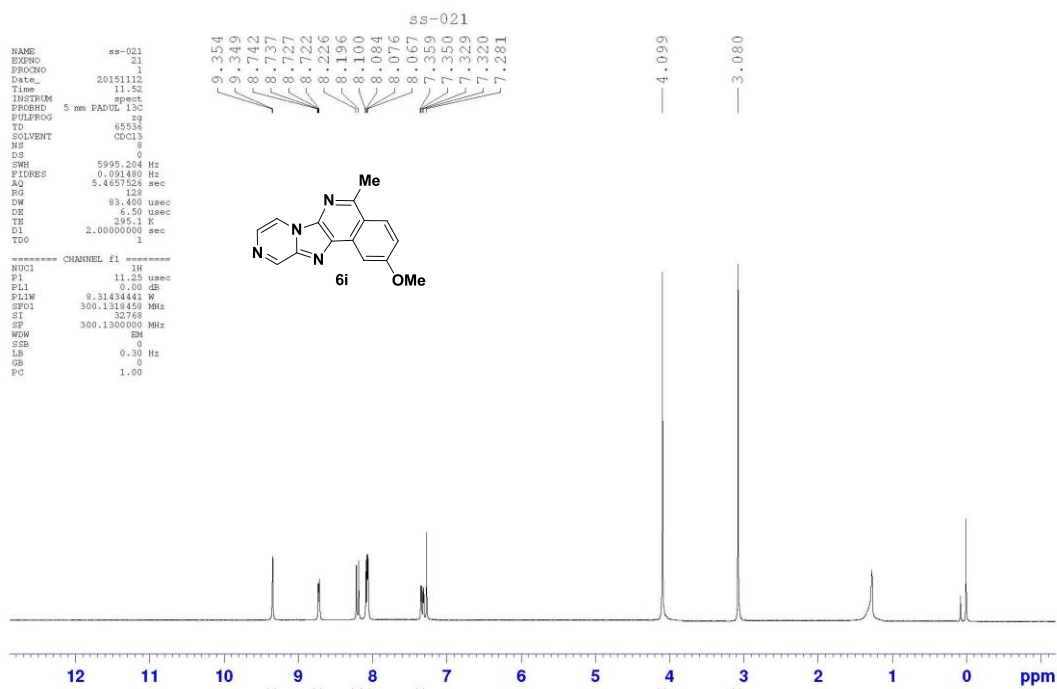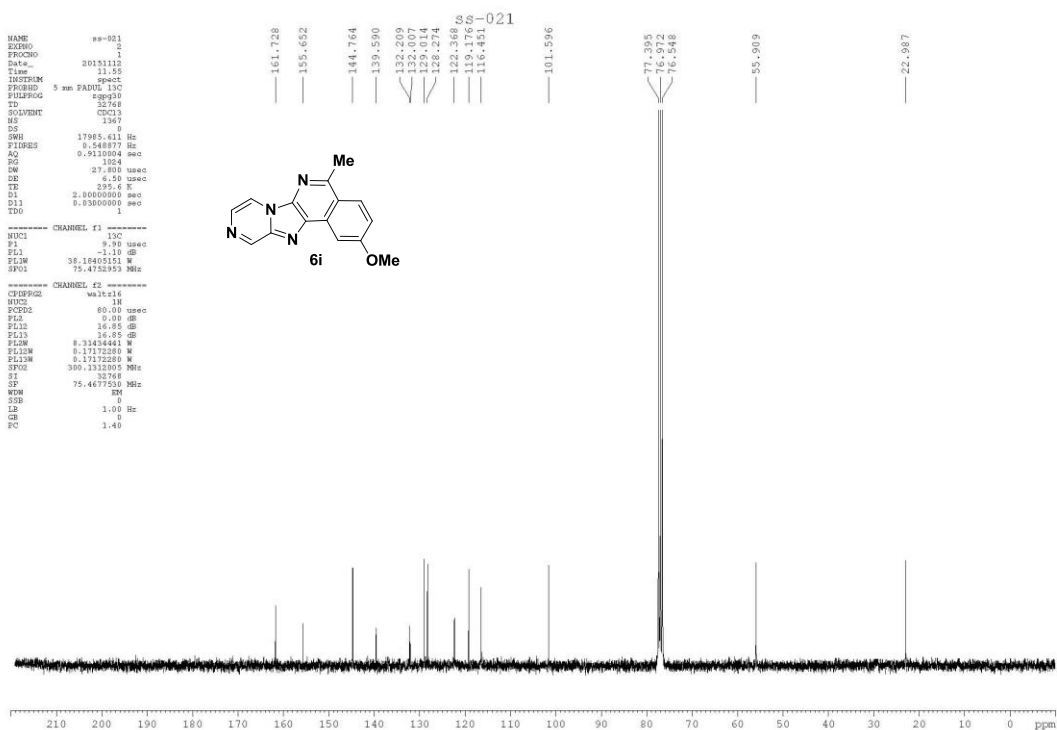

20160412-ss-036

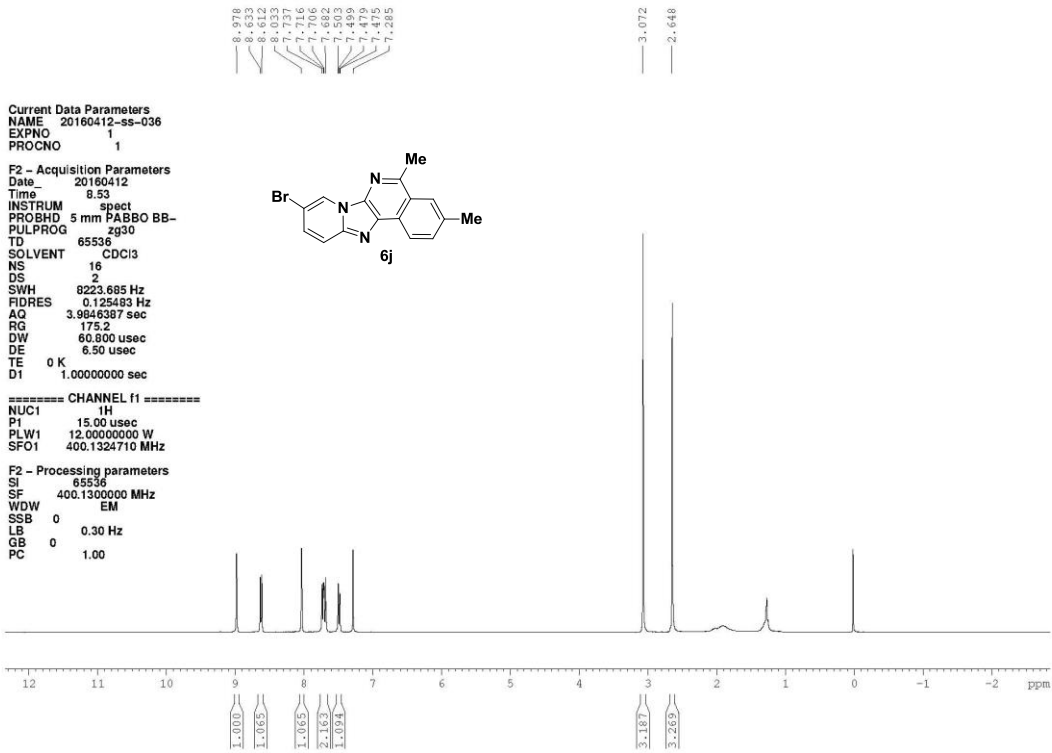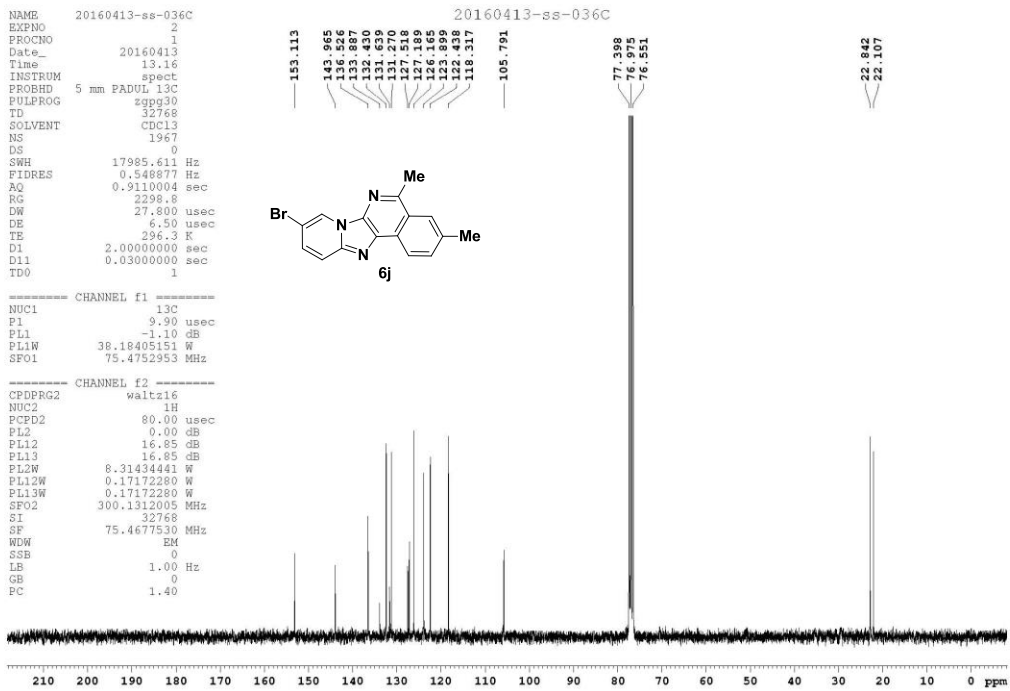



20160412-ss-035

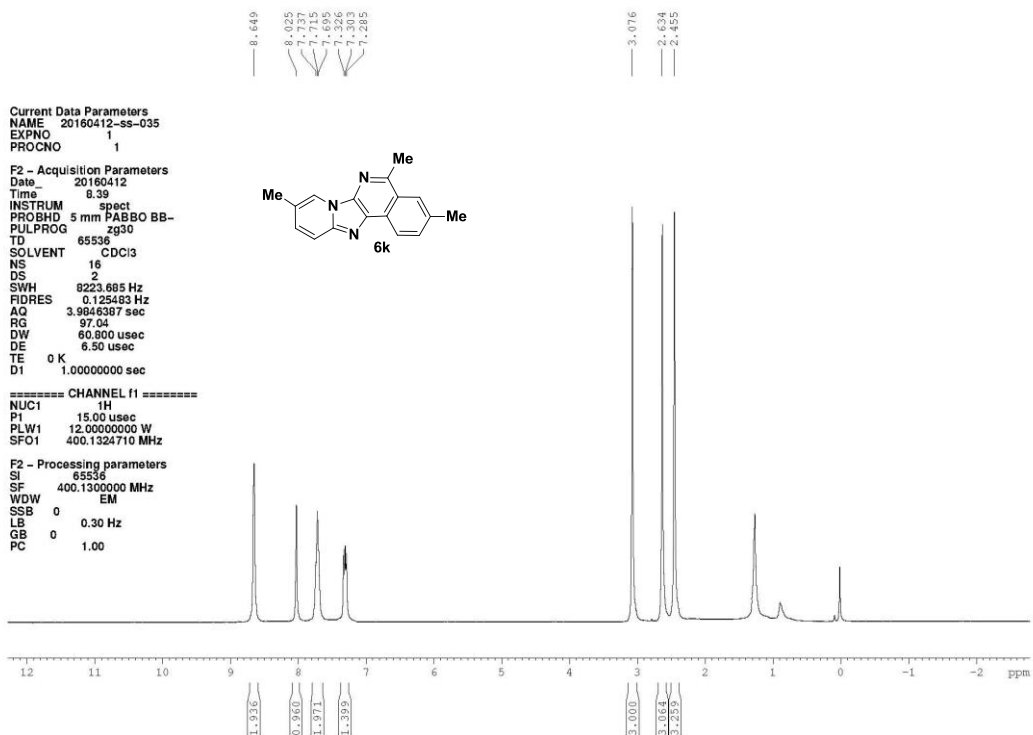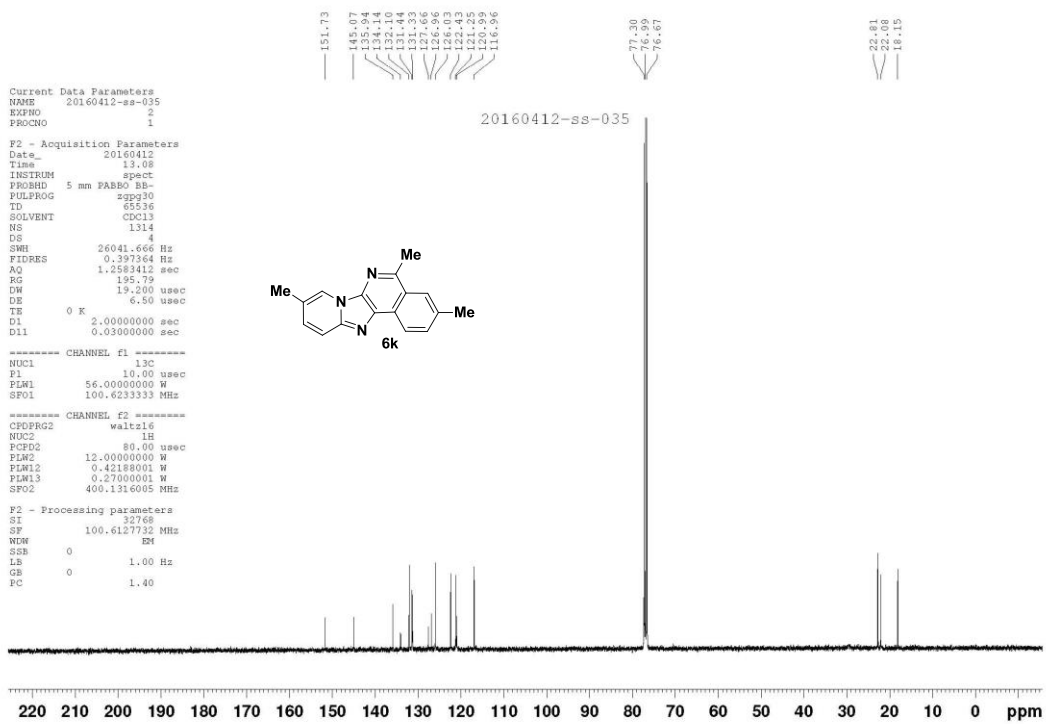

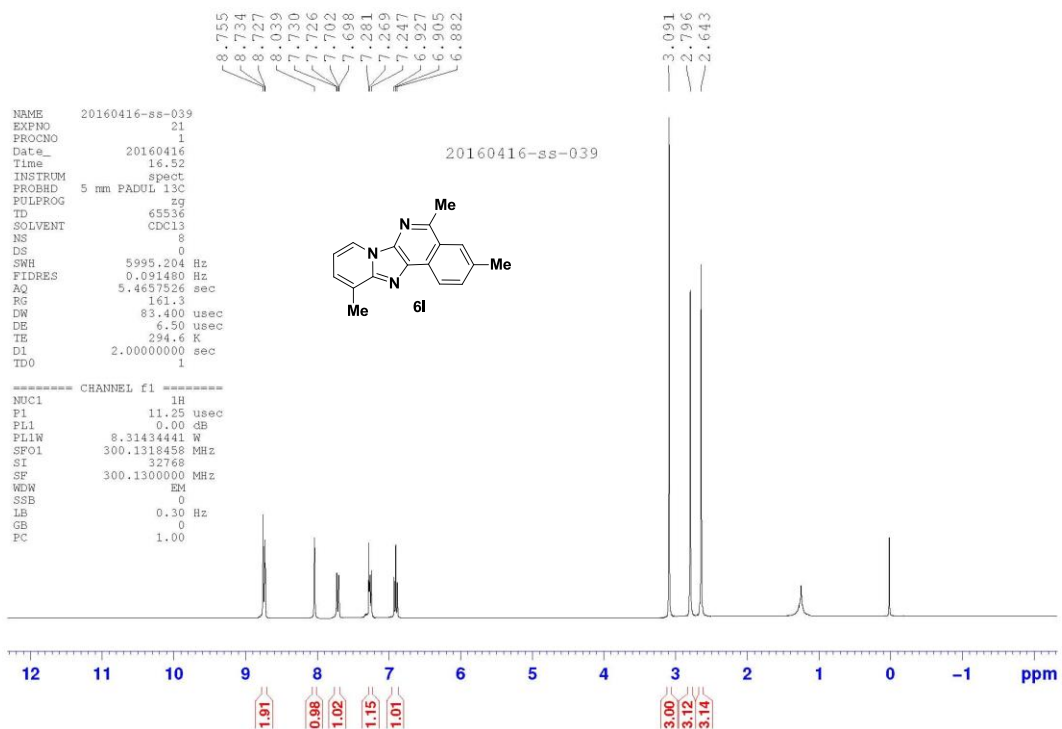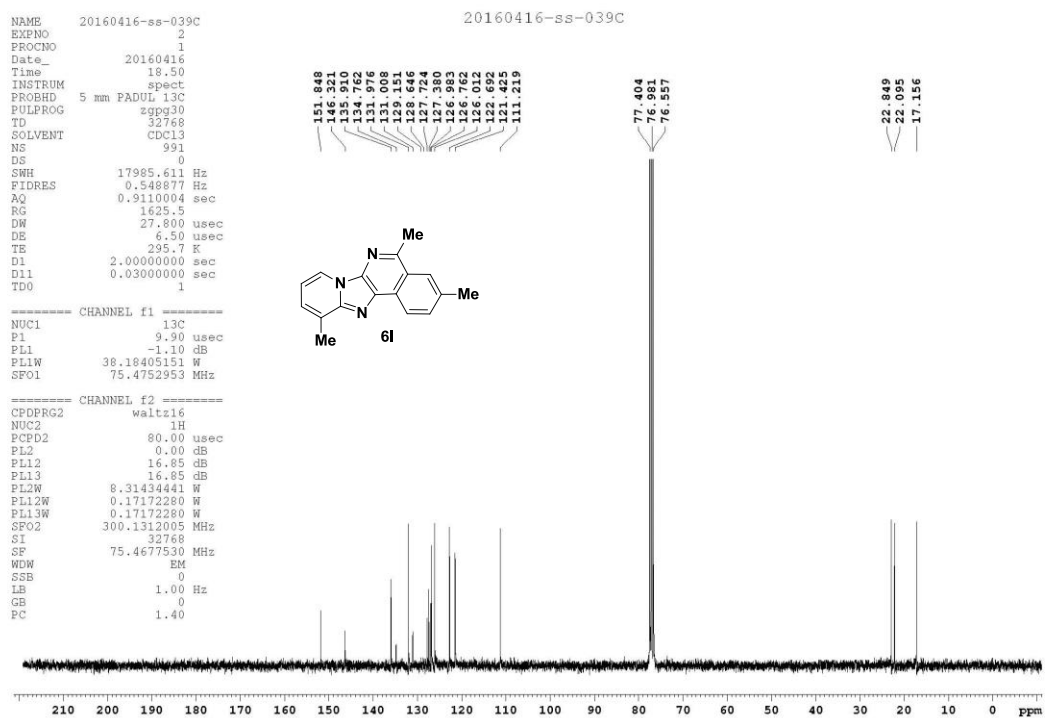

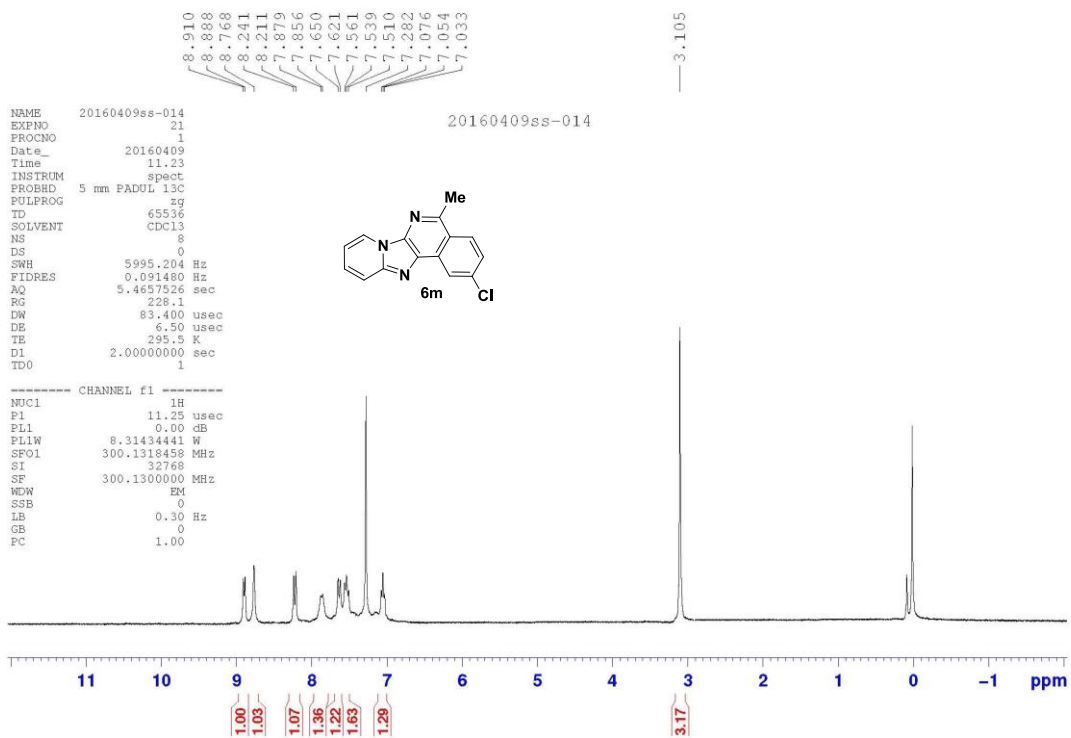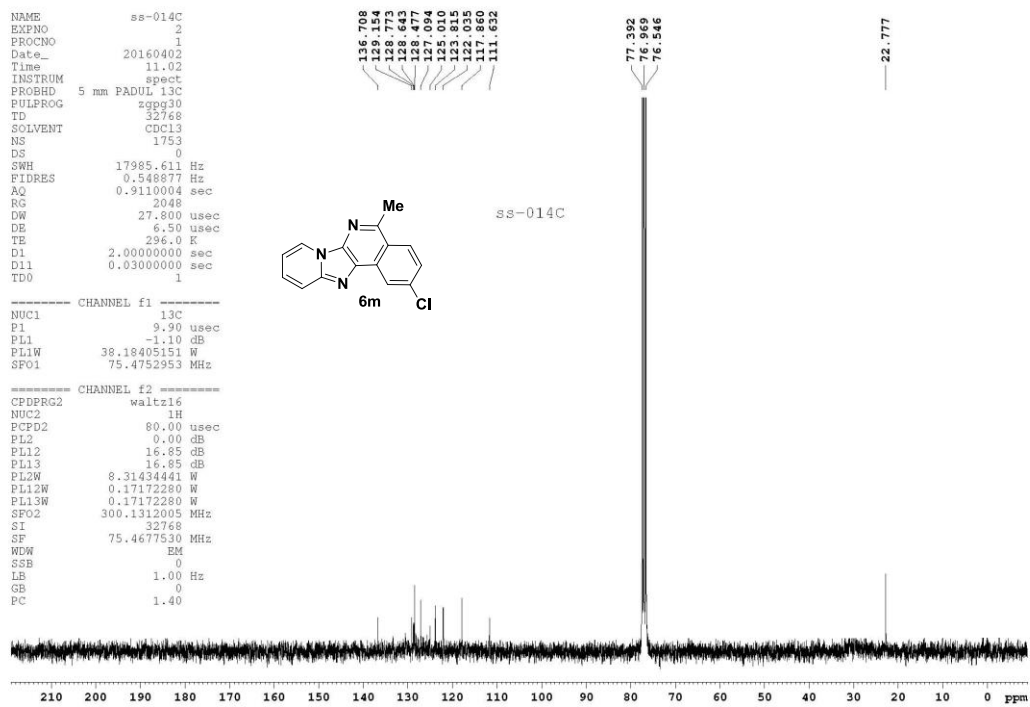

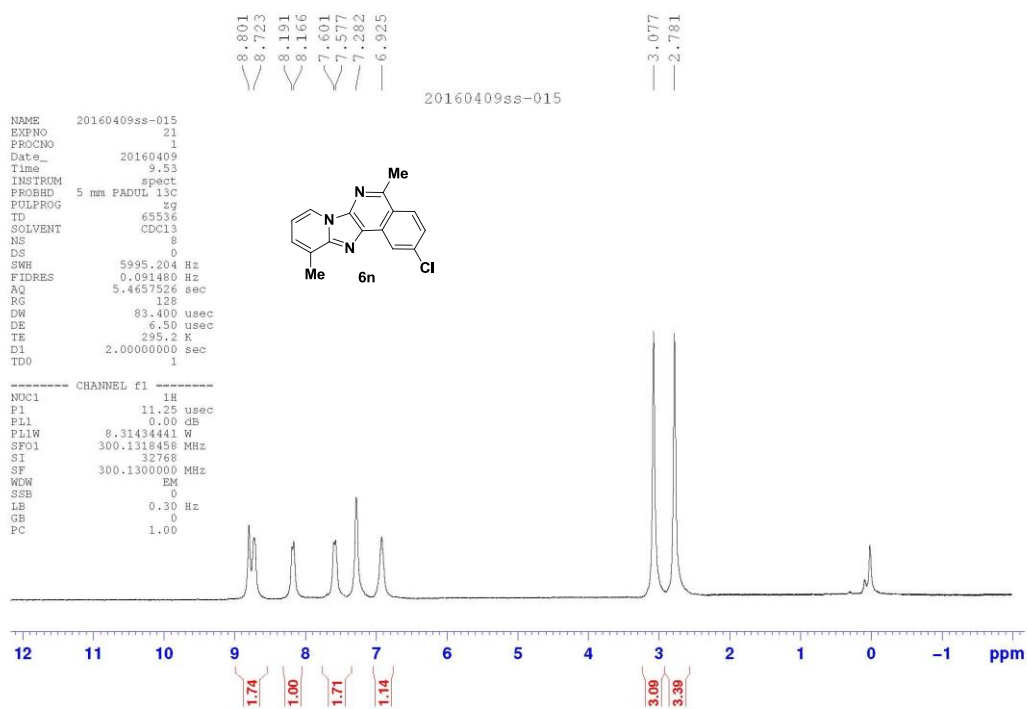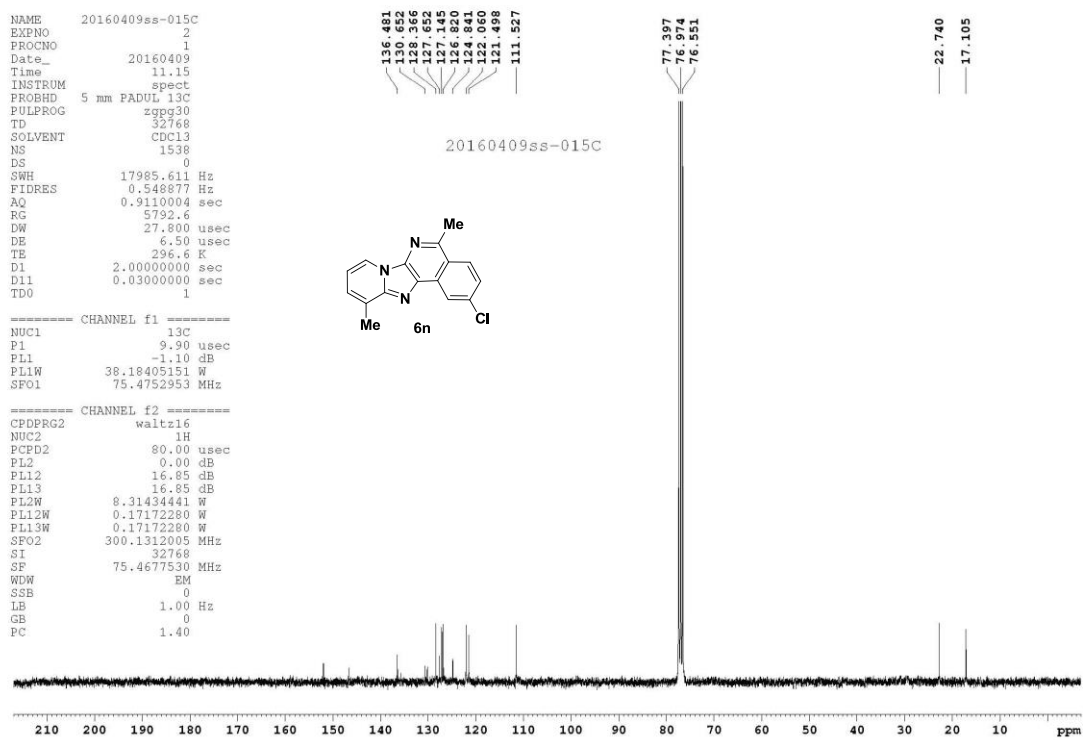

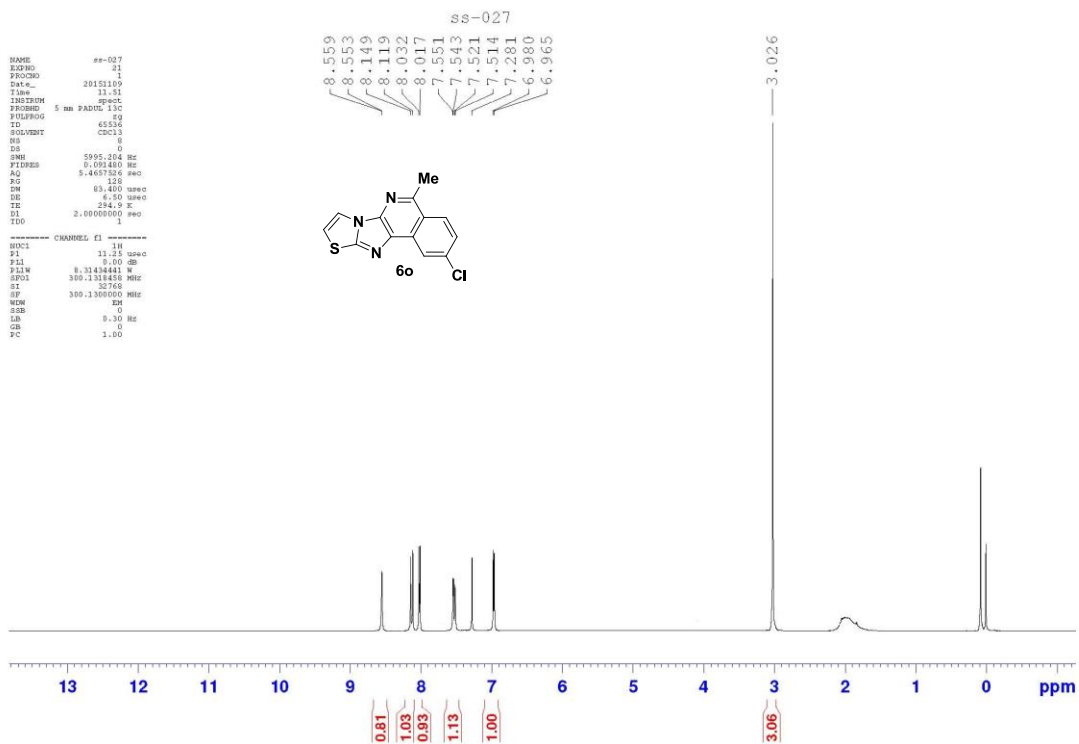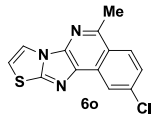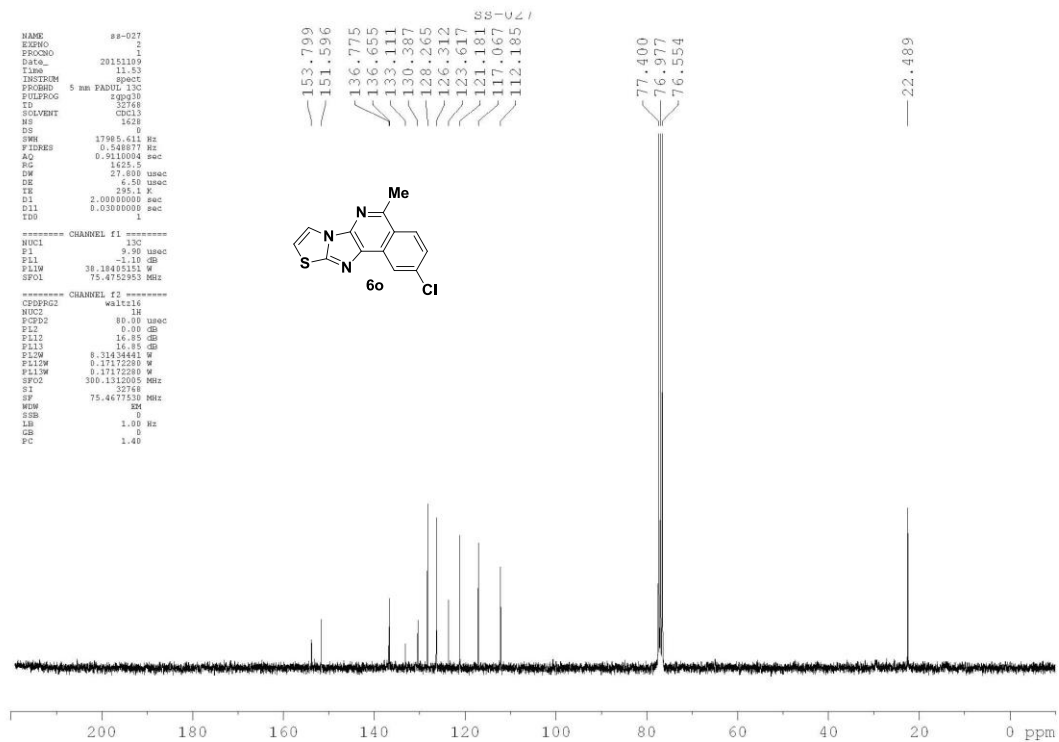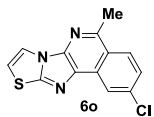

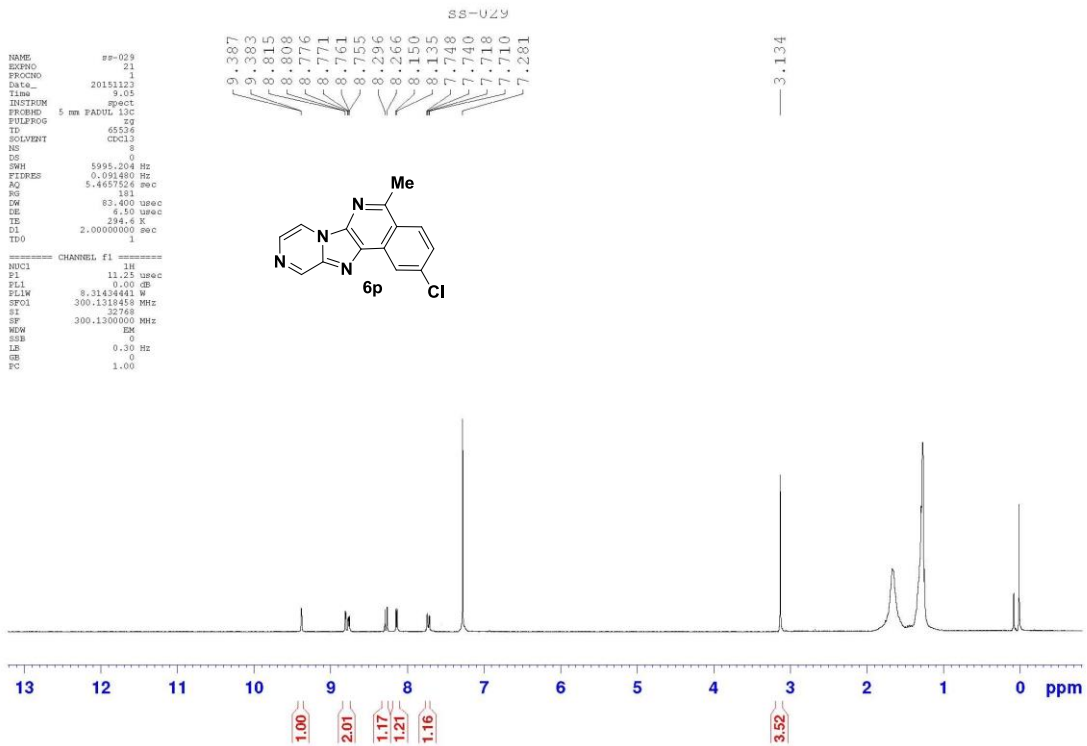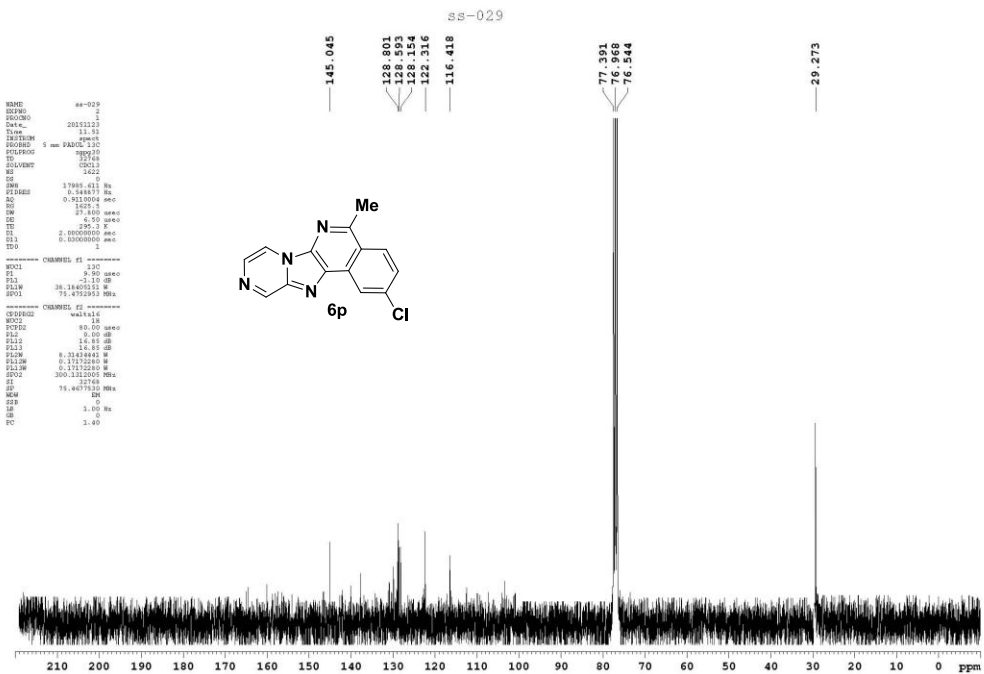

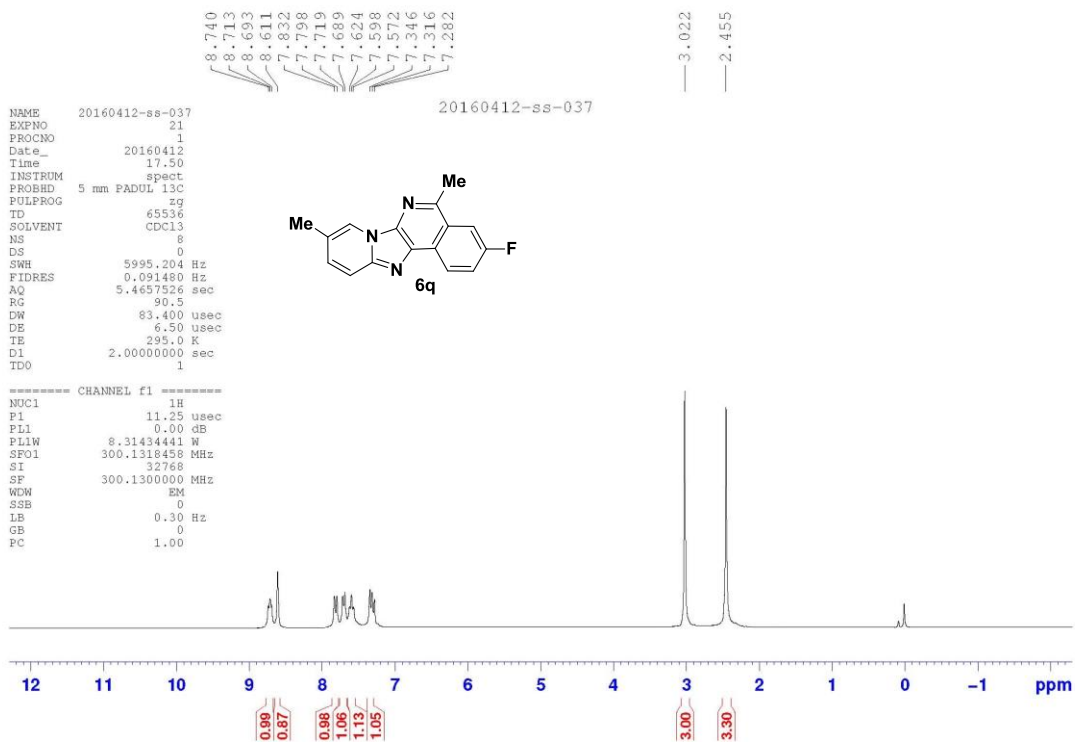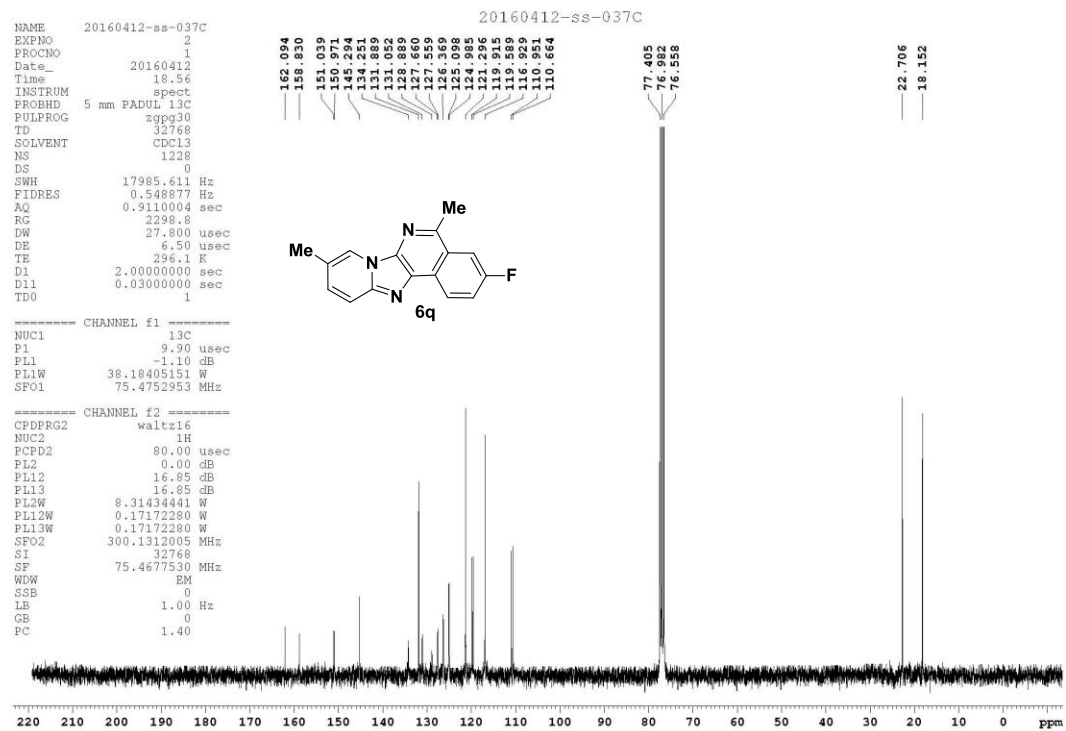

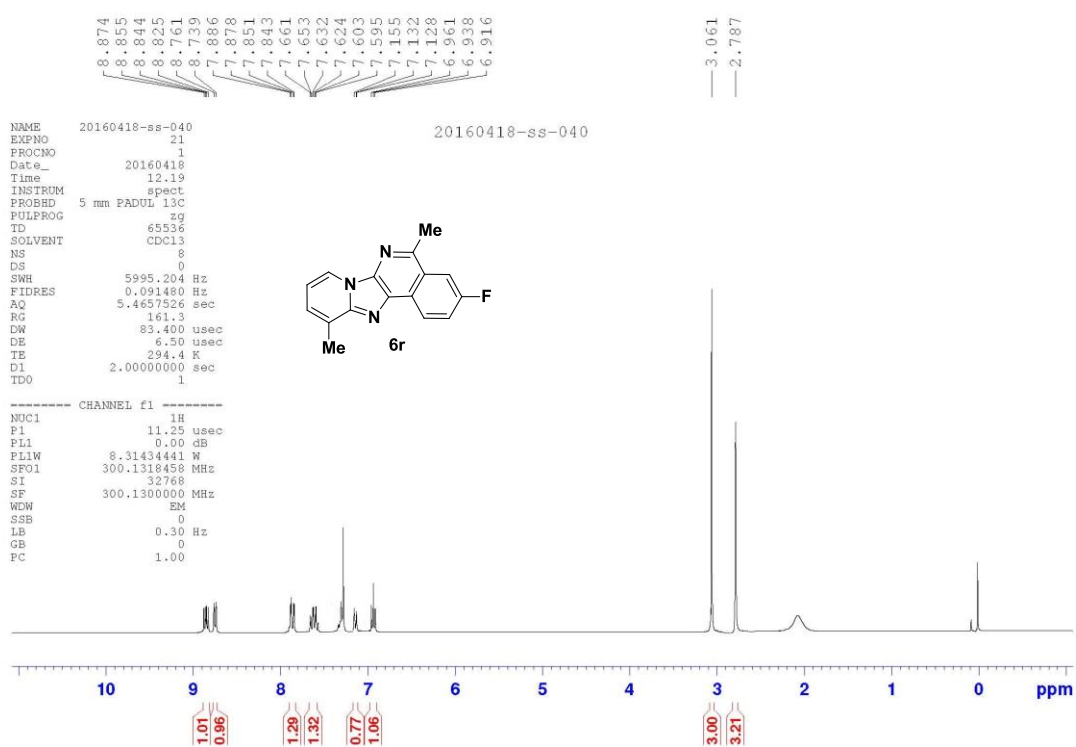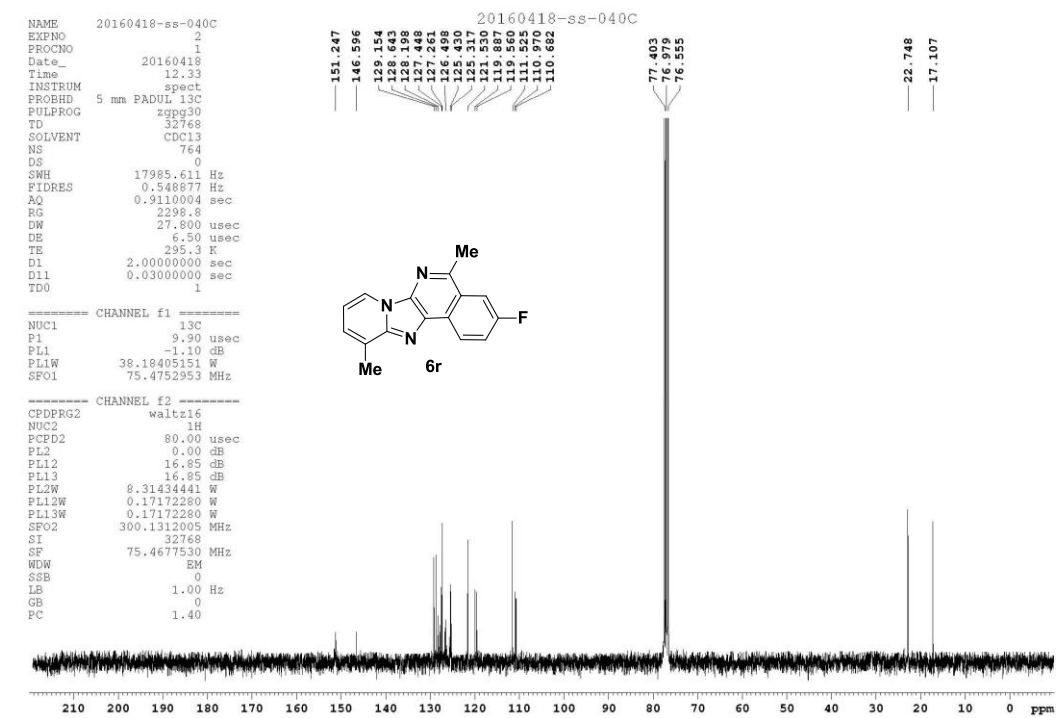



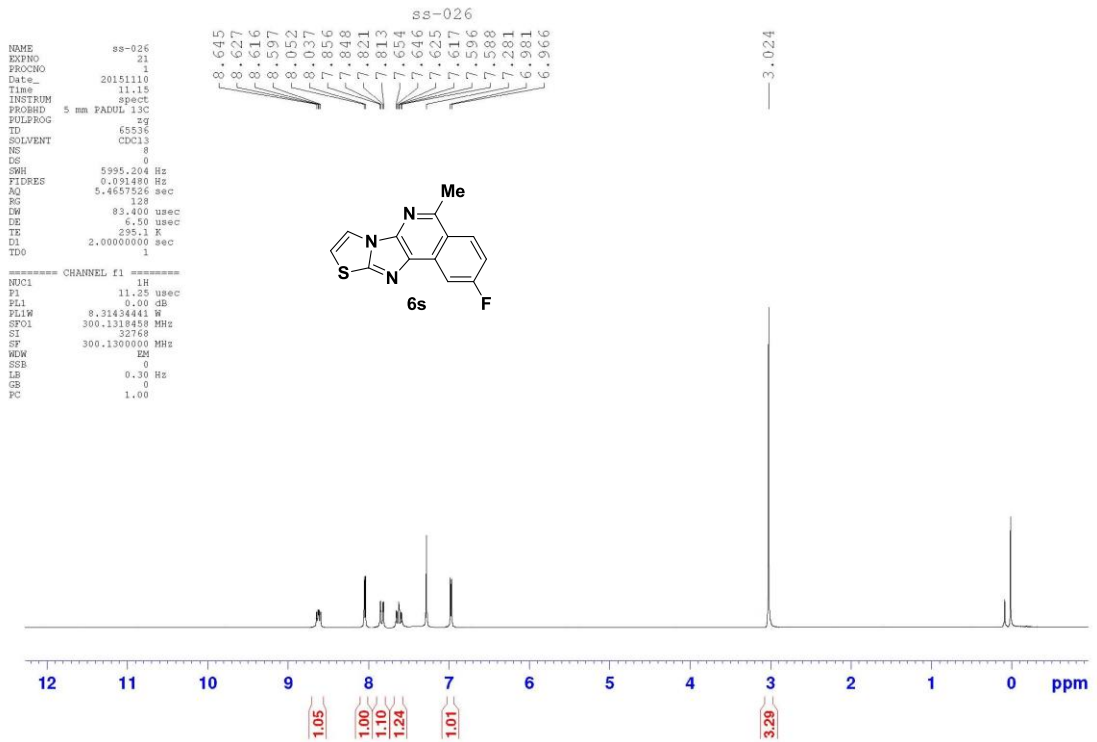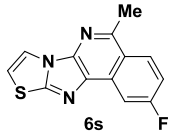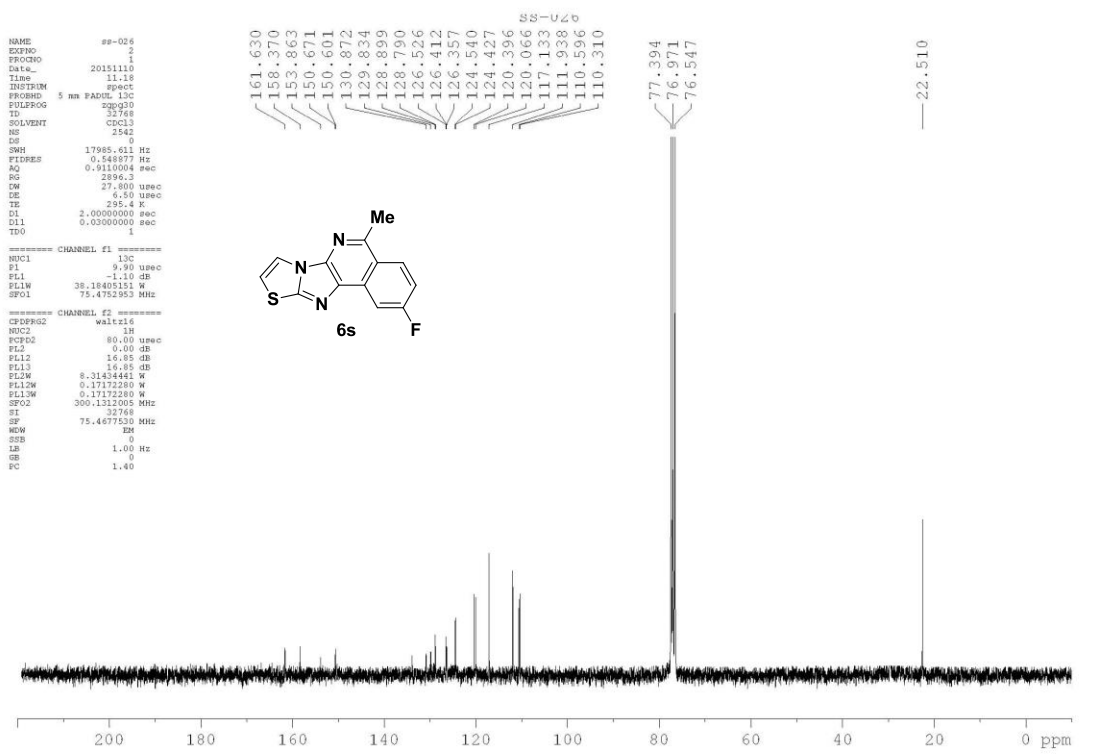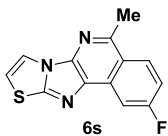

Supplement: Beilstein_J_Org_Chem-13-817-s001.pdf [file Beilstein_J_Org_Chem-13-817-s001.pdf]
